# Supplementary material for: Dynamics of Neospora caninum-Associated Abortions in a Dairy Sheep Flock and Results of a Test-and-Cull Control Programme
Source: MDPI journal article supplement (doi:10.3390/pathogens10111518), 2021-11-20
Supplement: s1 [file s1]

**Table S1.** Receiver operating characteristic (ROC) analysis for Nc SALUVET ELISA. The commercial ELISA ID Screen® *Neospora caninum* Indirect (IDvet, Grabels, France) and Western Blotting were used as reference methods. An optimal cut-off of RIPC = 35.08 was selected (bold text), with sensitivity and specificity of 97.73% and 97.30%, respectively. RIPC = relative index per cent; CI = confidence interval; LR + = Positive Likelihood ratio; LR - = Negative Likelihood ratio.

| Cutoff (RIPC) | Sensitivity | 95% CI          | Specificity | 95% CI                | LR +   | LR - |
|---------------|-------------|-----------------|-------------|-----------------------|--------|------|
| -6.143        | 1           | 0.9882 to 1.000 | 0.00208     | 0.00005253 to 0.01150 | 1.0021 | 0    |
| -5.595        | 1           | 0.9882 to 1.000 | 0.00415     | 0.000503 to 0.01491   | 1.0042 | 0    |
| -4.954        | 1           | 0.9882 to 1.000 | 0.00830     | 0.002266 to 0.02111   | 1.0084 | 0    |
| -4.741        | 1           | 0.9882 to 1.000 | 0.0104      | 0.003377 to 0.02404   | 1.0105 | 0    |
| -4.661        | 1           | 0.9882 to 1.000 | 0.0125      | 0.004582 to 0.02690   | 1.0126 | 0    |
| -4.517        | 1           | 0.9882 to 1.000 | 0.0166      | 0.007192 to 0.03244   | 1.0169 | 0    |
| -4.373        | 1           | 0.9882 to 1.000 | 0.0208      | 0.009993 to 0.03782   | 1.0212 | 0    |
| -4.212        | 1           | 0.9882 to 1.000 | 0.0228      | 0.01145 to 0.04047    | 1.0234 | 0    |
| -3.857        | 1           | 0.9882 to 1.000 | 0.0249      | 0.01293 to 0.04308    | 1.0255 | 0    |
| -3.49         | 1           | 0.9882 to 1.000 | 0.027       | 0.01444 to 0.04568    | 1.0277 | 0    |
| -3.316        | 1           | 0.9882 to 1.000 | 0.0311      | 0.01752 to 0.05081    | 1.0321 | 0    |
| -3.22         | 1           | 0.9882 to 1.000 | 0.0353      | 0.02068 to 0.05587    | 1.0366 | 0    |
| -3.153        | 1           | 0.9882 to 1.000 | 0.0394      | 0.02390 to 0.06088    | 1.041  | 0    |
| -3.009        | 1           | 0.9882 to 1.000 | 0.0415      | 0.02553 to 0.06336    | 1.0433 | 0    |
| -2.835        | 1           | 0.9882 to 1.000 | 0.0456      | 0.02882 to 0.06829    | 1.0478 | 0    |
| -2.739        | 1           | 0.9882 to 1.000 | 0.0477      | 0.03049 to 0.07074    | 1.0501 | 0    |
| -2.643        | 1           | 0.9882 to 1.000 | 0.0498      | 0.03216 to 0.07318    | 1.0524 | 0    |
| -2.594        | 1           | 0.9882 to 1.000 | 0.0539      | 0.03554 to 0.07804    | 1.057  | 0    |
| -2.546        | 1           | 0.9882 to 1.000 | 0.056       | 0.03724 to 0.08046    | 1.0593 | 0    |
| -2.355        | 1           | 0.9882 to 1.000 | 0.0581      | 0.03894 to 0.08287    | 1.0617 | 0    |
| -2.162        | 1           | 0.9882 to 1.000 | 0.0602      | 0.04066 to 0.08527    | 1.064  | 0    |
| -1.97         | 1           | 0.9882 to 1.000 | 0.0622      | 0.04238 to 0.08766    | 1.0664 | 0    |
| -1.805        | 1           | 0.9882 to 1.000 | 0.0685      | 0.04759 to 0.09481    | 1.0735 | 0    |
| -1.565        | 1           | 0.9882 to 1.000 | 0.0705      | 0.04934 to 0.09718    | 1.0759 | 0    |
| -1.298        | 1           | 0.9882 to 1.000 | 0.0726      | 0.05110 to 0.09954    | 1.0783 | 0    |
| -1.201        | 1           | 0.9882 to 1.000 | 0.0768      | 0.05462 to 0.1043     | 1.0831 | 0    |
| -1.105        | 1           | 0.9882 to 1.000 | 0.0788      | 0.05639 to 0.1066     | 1.0856 | 0    |
| -1.027        | 1           | 0.9882 to 1.000 | 0.083       | 0.05995 to 0.1113     | 1.0905 | 0    |
| -0.8829       | 1           | 0.9882 to 1.000 | 0.0851      | 0.06173 to 0.1136     | 1.093  | 0    |
| -0.6728       | 1           | 0.9882 to 1.000 | 0.0871      | 0.06352 to 0.1160     | 1.0955 | 0    |
| -0.5286       | 1           | 0.9882 to 1.000 | 0.0913      | 0.06711 to 0.1206     | 1.1005 | 0    |
| -0.4325       | 1           | 0.9882 to 1.000 | 0.0934      | 0.06891 to 0.1229     | 1.103  | 0    |
| -0.3364       | 1           | 0.9882 to 1.000 | 0.0954      | 0.07072 to 0.1252     | 1.1055 | 0    |
| -0.2403       | 1           | 0.9882 to 1.000 | 0.0975      | 0.07253 to 0.1276     | 1.108  | 0    |
| -0.0481       | 1           | 0.9882 to 1.000 | 0.0996      | 0.07434 to 0.1299     | 1.1106 | 0    |

|        |        |                  |        |                   |        |        |
|--------|--------|------------------|--------|-------------------|--------|--------|
| 0.1204 | 1      | 0.9882 to 1.000  | 0.1017 | 0.07616 to 0.1322 | 1.1132 | 0      |
| 0.172  | 1      | 0.9882 to 1.000  | 0.1037 | 0.07798 to 0.1345 | 1.1157 | 0      |
| 0.2919 | 1      | 0.9882 to 1.000  | 0.1058 | 0.07980 to 0.1368 | 1.1183 | 0      |
| 0.5661 | 1      | 0.9882 to 1.000  | 0.1079 | 0.08163 to 0.1391 | 1.121  | 0      |
| 0.7583 | 1      | 0.9882 to 1.000  | 0.11   | 0.08346 to 0.1414 | 1.1236 | 0      |
| 0.8425 | 1      | 0.9882 to 1.000  | 0.1141 | 0.08713 to 0.1459 | 1.1288 | 0      |
| 0.9866 | 1      | 0.9882 to 1.000  | 0.1162 | 0.08897 to 0.1482 | 1.1315 | 0      |
| 1.108  | 1      | 0.9882 to 1.000  | 0.1203 | 0.09265 to 0.1528 | 1.1368 | 0      |
| 1.252  | 1      | 0.9882 to 1.000  | 0.1224 | 0.09450 to 0.1550 | 1.1395 | 0      |
| 1.372  | 1      | 0.9882 to 1.000  | 0.1266 | 0.09820 to 0.1596 | 1.145  | 0      |
| 1.42   | 1      | 0.9882 to 1.000  | 0.1286 | 0.1001 to 0.1618  | 1.1476 | 0      |
| 1.49   | 1      | 0.9882 to 1.000  | 0.1307 | 0.1019 to 0.1641  | 1.1504 | 0      |
| 1.586  | 1      | 0.9882 to 1.000  | 0.1328 | 0.1038 to 0.1664  | 1.1531 | 0      |
| 1.648  | 1      | 0.9882 to 1.000  | 0.1349 | 0.1056 to 0.1686  | 1.1559 | 0      |
| 1.734  | 1      | 0.9882 to 1.000  | 0.1369 | 0.1075 to 0.1709  | 1.1586 | 0      |
| 1.912  | 1      | 0.9882 to 1.000  | 0.139  | 0.1094 to 0.1731  | 1.1614 | 0      |
| 2.163  | 1      | 0.9882 to 1.000  | 0.1411 | 0.1112 to 0.1754  | 1.1643 | 0      |
| 2.325  | 1      | 0.9882 to 1.000  | 0.1432 | 0.1131 to 0.1776  | 1.1671 | 0      |
| 2.469  | 1      | 0.9882 to 1.000  | 0.1452 | 0.1150 to 0.1799  | 1.1699 | 0      |
| 2.672  | 1      | 0.9882 to 1.000  | 0.1473 | 0.1169 to 0.1821  | 1.1727 | 0      |
| 2.816  | 1      | 0.9882 to 1.000  | 0.1494 | 0.1188 to 0.1844  | 1.1756 | 0      |
| 2.987  | 1      | 0.9882 to 1.000  | 0.1515 | 0.1206 to 0.1866  | 1.1786 | 0      |
| 3.257  | 1      | 0.9882 to 1.000  | 0.1535 | 0.1225 to 0.1889  | 1.1813 | 0      |
| 3.805  | 1      | 0.9882 to 1.000  | 0.1556 | 0.1244 to 0.1911  | 1.1843 | 0      |
| 4.208  | 1      | 0.9882 to 1.000  | 0.1577 | 0.1263 to 0.1933  | 1.1872 | 0      |
| 4.332  | 1      | 0.9882 to 1.000  | 0.1598 | 0.1282 to 0.1956  | 1.1902 | 0      |
| 4.618  | 1      | 0.9882 to 1.000  | 0.1618 | 0.1301 to 0.1978  | 1.193  | 0      |
| 4.85   | 1      | 0.9882 to 1.000  | 0.1639 | 0.1320 to 0.2000  | 1.196  | 0      |
| 4.95   | 1      | 0.9882 to 1.000  | 0.166  | 0.1339 to 0.2023  | 1.199  | 0      |
| 5.094  | 1      | 0.9882 to 1.000  | 0.168  | 0.1358 to 0.2045  | 1.2019 | 0      |
| 5.225  | 1      | 0.9882 to 1.000  | 0.1701 | 0.1377 to 0.2067  | 1.205  | 0      |
| 5.369  | 1      | 0.9882 to 1.000  | 0.1722 | 0.1396 to 0.2089  | 1.208  | 0      |
| 5.508  | 1      | 0.9882 to 1.000  | 0.1743 | 0.1415 to 0.2111  | 1.2111 | 0      |
| 5.541  | 0.9968 | 0.9822 to 0.9999 | 0.1743 | 0.1415 to 0.2111  | 1.2072 | 0.0184 |
| 5.583  | 0.9968 | 0.9822 to 0.9999 | 0.1763 | 0.1434 to 0.2134  | 1.2101 | 0.0182 |
| 5.646  | 0.9968 | 0.9822 to 0.9999 | 0.1784 | 0.1453 to 0.2156  | 1.2132 | 0.0179 |
| 5.778  | 0.9968 | 0.9822 to 0.9999 | 0.1805 | 0.1472 to 0.2178  | 1.2164 | 0.0177 |
| 6.018  | 0.9968 | 0.9822 to 0.9999 | 0.1826 | 0.1491 to 0.2200  | 1.2195 | 0.0175 |
| 6.224  | 0.9968 | 0.9822 to 0.9999 | 0.1846 | 0.1510 to 0.2222  | 1.2225 | 0.0173 |
| 6.355  | 0.9968 | 0.9822 to 0.9999 | 0.1867 | 0.1529 to 0.2244  | 1.2256 | 0.0171 |
| 6.509  | 0.9968 | 0.9822 to 0.9999 | 0.1888 | 0.1548 to 0.2266  | 1.2288 | 0.0169 |
| 6.825  | 0.9968 | 0.9822 to 0.9999 | 0.1909 | 0.1567 to 0.2288  | 1.232  | 0.0168 |
| 7.274  | 0.9968 | 0.9822 to 0.9999 | 0.1929 | 0.1587 to 0.2311  | 1.235  | 0.0166 |
| 7.657  | 0.9968 | 0.9822 to 0.9999 | 0.195  | 0.1606 to 0.2333  | 1.2383 | 0.0164 |
| 7.921  | 0.9968 | 0.9822 to 0.9999 | 0.1971 | 0.1625 to 0.2355  | 1.2415 | 0.0162 |

|       |        |                  |        |                  |        |        |
|-------|--------|------------------|--------|------------------|--------|--------|
| 8.104 | 0.9968 | 0.9822 to 0.9999 | 0.2012 | 0.1663 to 0.2399 | 1.2479 | 0.0159 |
| 8.288 | 0.9968 | 0.9822 to 0.9999 | 0.2033 | 0.1683 to 0.2421 | 1.2512 | 0.0157 |
| 8.421 | 0.9968 | 0.9822 to 0.9999 | 0.2054 | 0.1702 to 0.2443 | 1.2545 | 0.0156 |
| 8.446 | 0.9968 | 0.9822 to 0.9999 | 0.2075 | 0.1721 to 0.2465 | 1.2578 | 0.0154 |
| 8.529 | 0.9968 | 0.9822 to 0.9999 | 0.2095 | 0.1740 to 0.2486 | 1.261  | 0.0153 |
| 8.719 | 0.9968 | 0.9822 to 0.9999 | 0.2116 | 0.1760 to 0.2508 | 1.2643 | 0.0151 |
| 8.835 | 0.9968 | 0.9822 to 0.9999 | 0.2137 | 0.1779 to 0.2530 | 1.2677 | 0.015  |
| 8.933 | 0.9968 | 0.9822 to 0.9999 | 0.2178 | 0.1818 to 0.2574 | 1.2744 | 0.0147 |
| 9.066 | 0.9968 | 0.9822 to 0.9999 | 0.2199 | 0.1837 to 0.2596 | 1.2778 | 0.0146 |
| 9.159 | 0.9968 | 0.9822 to 0.9999 | 0.222  | 0.1857 to 0.2618 | 1.2812 | 0.0144 |
| 9.226 | 0.9968 | 0.9822 to 0.9999 | 0.2241 | 0.1876 to 0.2640 | 1.2847 | 0.0143 |
| 9.274 | 0.9968 | 0.9822 to 0.9999 | 0.2261 | 0.1895 to 0.2661 | 1.288  | 0.0142 |
| 9.354 | 0.9968 | 0.9822 to 0.9999 | 0.2282 | 0.1915 to 0.2683 | 1.2915 | 0.014  |
| 9.554 | 0.9968 | 0.9822 to 0.9999 | 0.2303 | 0.1934 to 0.2705 | 1.2951 | 0.0139 |
| 9.749 | 0.9968 | 0.9822 to 0.9999 | 0.2324 | 0.1954 to 0.2727 | 1.2986 | 0.0138 |
| 9.862 | 0.9968 | 0.9822 to 0.9999 | 0.2344 | 0.1973 to 0.2749 | 1.302  | 0.0137 |
| 9.936 | 0.9968 | 0.9822 to 0.9999 | 0.2365 | 0.1993 to 0.2770 | 1.3056 | 0.0135 |
| 9.977 | 0.9968 | 0.9822 to 0.9999 | 0.2386 | 0.2012 to 0.2792 | 1.3092 | 0.0134 |
| 10.03 | 0.9968 | 0.9822 to 0.9999 | 0.2427 | 0.2051 to 0.2836 | 1.3163 | 0.0132 |
| 10.06 | 0.9968 | 0.9822 to 0.9999 | 0.2448 | 0.2071 to 0.2857 | 1.3199 | 0.0131 |
| 10.17 | 0.9968 | 0.9822 to 0.9999 | 0.2469 | 0.2090 to 0.2879 | 1.3236 | 0.013  |
| 10.33 | 0.9968 | 0.9822 to 0.9999 | 0.249  | 0.2110 to 0.2901 | 1.3273 | 0.0129 |
| 10.42 | 0.9968 | 0.9822 to 0.9999 | 0.251  | 0.2129 to 0.2922 | 1.3308 | 0.0127 |
| 10.5  | 0.9968 | 0.9822 to 0.9999 | 0.2531 | 0.2149 to 0.2944 | 1.3346 | 0.0126 |
| 10.57 | 0.9968 | 0.9822 to 0.9999 | 0.2573 | 0.2188 to 0.2987 | 1.3421 | 0.0124 |
| 10.62 | 0.9968 | 0.9822 to 0.9999 | 0.2593 | 0.2208 to 0.3009 | 1.3458 | 0.0123 |
| 10.66 | 0.9968 | 0.9822 to 0.9999 | 0.2614 | 0.2227 to 0.3031 | 1.3496 | 0.0122 |
| 10.69 | 0.9968 | 0.9822 to 0.9999 | 0.2635 | 0.2247 to 0.3052 | 1.3534 | 0.0121 |
| 10.71 | 0.9968 | 0.9822 to 0.9999 | 0.2656 | 0.2266 to 0.3074 | 1.3573 | 0.012  |
| 10.72 | 0.9968 | 0.9822 to 0.9999 | 0.2676 | 0.2286 to 0.3095 | 1.361  | 0.012  |
| 10.74 | 0.9968 | 0.9822 to 0.9999 | 0.2697 | 0.2306 to 0.3117 | 1.3649 | 0.0119 |
| 10.8  | 0.9968 | 0.9822 to 0.9999 | 0.2718 | 0.2325 to 0.3139 | 1.3689 | 0.0118 |
| 10.9  | 0.9968 | 0.9822 to 0.9999 | 0.2739 | 0.2345 to 0.3160 | 1.3728 | 0.0117 |
| 10.97 | 0.9968 | 0.9822 to 0.9999 | 0.2759 | 0.2365 to 0.3182 | 1.3766 | 0.0116 |
| 11    | 0.9968 | 0.9822 to 0.9999 | 0.278  | 0.2384 to 0.3203 | 1.3806 | 0.0115 |
| 11.02 | 0.9968 | 0.9822 to 0.9999 | 0.2801 | 0.2404 to 0.3225 | 1.3846 | 0.0114 |
| 11.06 | 0.9968 | 0.9822 to 0.9999 | 0.2822 | 0.2424 to 0.3246 | 1.3887 | 0.0113 |
| 11.07 | 0.9968 | 0.9822 to 0.9999 | 0.2842 | 0.2444 to 0.3268 | 1.3926 | 0.0113 |
| 11.12 | 0.9968 | 0.9822 to 0.9999 | 0.2863 | 0.2463 to 0.3289 | 1.3967 | 0.0112 |
| 11.19 | 0.9968 | 0.9822 to 0.9999 | 0.2884 | 0.2483 to 0.3311 | 1.4008 | 0.0111 |
| 11.32 | 0.9968 | 0.9822 to 0.9999 | 0.2905 | 0.2503 to 0.3332 | 1.4049 | 0.011  |
| 11.42 | 0.9968 | 0.9822 to 0.9999 | 0.2925 | 0.2523 to 0.3354 | 1.4089 | 0.0109 |
| 11.47 | 0.9968 | 0.9822 to 0.9999 | 0.2946 | 0.2542 to 0.3375 | 1.4131 | 0.0109 |
| 11.51 | 0.9968 | 0.9822 to 0.9999 | 0.2967 | 0.2562 to 0.3397 | 1.4173 | 0.0108 |
| 11.53 | 0.9968 | 0.9822 to 0.9999 | 0.2988 | 0.2582 to 0.3418 | 1.4216 | 0.0107 |

|       |        |                  |        |                  |        |         |
|-------|--------|------------------|--------|------------------|--------|---------|
| 11.57 | 0.9968 | 0.9822 to 0.9999 | 0.3008 | 0.2602 to 0.3439 | 1.4256 | 0.0106  |
| 11.62 | 0.9968 | 0.9822 to 0.9999 | 0.3029 | 0.2622 to 0.3461 | 1.4299 | 0.0106  |
| 11.66 | 0.9968 | 0.9822 to 0.9999 | 0.305  | 0.2641 to 0.3482 | 1.4342 | 0.0105  |
| 11.67 | 0.9968 | 0.9822 to 0.9999 | 0.3071 | 0.2661 to 0.3504 | 1.4386 | 0.0104  |
| 11.69 | 0.9968 | 0.9822 to 0.9999 | 0.3091 | 0.2681 to 0.3525 | 1.4428 | 0.0104  |
| 11.74 | 0.9968 | 0.9822 to 0.9999 | 0.3112 | 0.2701 to 0.3546 | 1.4472 | 0.0103  |
| 11.76 | 0.9968 | 0.9822 to 0.9999 | 0.3133 | 0.2721 to 0.3568 | 1.4516 | 0.0102  |
| 11.8  | 0.9968 | 0.9822 to 0.9999 | 0.3154 | 0.2741 to 0.3589 | 1.456  | 0.0101  |
| 11.83 | 0.9968 | 0.9822 to 0.9999 | 0.3174 | 0.2761 to 0.3610 | 1.4603 | 0.0101  |
| 11.84 | 0.9968 | 0.9822 to 0.9999 | 0.3195 | 0.2781 to 0.3632 | 1.4648 | 0.01    |
| 11.84 | 0.9968 | 0.9822 to 0.9999 | 0.3216 | 0.2800 to 0.3653 | 1.4693 | 0.01    |
| 11.88 | 0.9968 | 0.9822 to 0.9999 | 0.3237 | 0.2820 to 0.3674 | 1.4739 | 0.00990 |
| 11.96 | 0.9968 | 0.9822 to 0.9999 | 0.3257 | 0.2840 to 0.3696 | 1.4783 | 0.00980 |
| 12.03 | 0.9968 | 0.9822 to 0.9999 | 0.3278 | 0.2860 to 0.3717 | 1.4829 | 0.00980 |
| 12.07 | 0.9968 | 0.9822 to 0.9999 | 0.3299 | 0.2880 to 0.3738 | 1.4875 | 0.00970 |
| 12.09 | 0.9968 | 0.9822 to 0.9999 | 0.332  | 0.2900 to 0.3760 | 1.4922 | 0.00960 |
| 12.1  | 0.9968 | 0.9822 to 0.9999 | 0.334  | 0.2920 to 0.3781 | 1.4967 | 0.00960 |
| 12.12 | 0.9968 | 0.9822 to 0.9999 | 0.3361 | 0.2940 to 0.3802 | 1.5014 | 0.00950 |
| 12.15 | 0.9968 | 0.9822 to 0.9999 | 0.3382 | 0.2960 to 0.3823 | 1.5062 | 0.00950 |
| 12.25 | 0.9968 | 0.9822 to 0.9999 | 0.3402 | 0.2980 to 0.3845 | 1.5108 | 0.00940 |
| 12.34 | 0.9968 | 0.9822 to 0.9999 | 0.3423 | 0.3000 to 0.3866 | 1.5156 | 0.00930 |
| 12.37 | 0.9968 | 0.9822 to 0.9999 | 0.3444 | 0.3020 to 0.3887 | 1.5204 | 0.00930 |
| 12.41 | 0.9968 | 0.9822 to 0.9999 | 0.3465 | 0.3040 to 0.3908 | 1.5253 | 0.00920 |
| 12.43 | 0.9968 | 0.9822 to 0.9999 | 0.3485 | 0.3060 to 0.3930 | 1.53   | 0.00920 |
| 12.49 | 0.9968 | 0.9822 to 0.9999 | 0.3506 | 0.3080 to 0.3951 | 1.535  | 0.00910 |
| 12.55 | 0.9968 | 0.9822 to 0.9999 | 0.3527 | 0.3100 to 0.3972 | 1.5399 | 0.00910 |
| 12.57 | 0.9968 | 0.9822 to 0.9999 | 0.3548 | 0.3120 to 0.3993 | 1.5449 | 0.00900 |
| 12.6  | 0.9968 | 0.9822 to 0.9999 | 0.3568 | 0.3140 to 0.4014 | 1.5498 | 0.00900 |
| 12.63 | 0.9968 | 0.9822 to 0.9999 | 0.3589 | 0.3160 to 0.4035 | 1.5548 | 0.00890 |
| 12.67 | 0.9968 | 0.9822 to 0.9999 | 0.361  | 0.3180 to 0.4057 | 1.5599 | 0.00890 |
| 12.7  | 0.9968 | 0.9822 to 0.9999 | 0.3631 | 0.3201 to 0.4078 | 1.5651 | 0.00880 |
| 12.71 | 0.9968 | 0.9822 to 0.9999 | 0.3651 | 0.3221 to 0.4099 | 1.57   | 0.00880 |
| 12.73 | 0.9968 | 0.9822 to 0.9999 | 0.3672 | 0.3241 to 0.4120 | 1.5752 | 0.00870 |
| 12.77 | 0.9968 | 0.9822 to 0.9999 | 0.3693 | 0.3261 to 0.4141 | 1.5805 | 0.00870 |
| 12.82 | 0.9968 | 0.9822 to 0.9999 | 0.3714 | 0.3281 to 0.4162 | 1.5857 | 0.00860 |
| 12.89 | 0.9968 | 0.9822 to 0.9999 | 0.3734 | 0.3301 to 0.4183 | 1.5908 | 0.00860 |
| 12.95 | 0.9968 | 0.9822 to 0.9999 | 0.3755 | 0.3321 to 0.4204 | 1.5962 | 0.00850 |
| 12.96 | 0.9968 | 0.9822 to 0.9999 | 0.3776 | 0.3341 to 0.4226 | 1.6015 | 0.00850 |
| 13.01 | 0.9968 | 0.9822 to 0.9999 | 0.3797 | 0.3362 to 0.4247 | 1.607  | 0.00840 |
| 13.05 | 0.9968 | 0.9822 to 0.9999 | 0.3817 | 0.3382 to 0.4268 | 1.6122 | 0.00840 |
| 13.06 | 0.9968 | 0.9822 to 0.9999 | 0.3838 | 0.3402 to 0.4289 | 1.6177 | 0.00830 |
| 13.12 | 0.9968 | 0.9822 to 0.9999 | 0.3859 | 0.3422 to 0.4310 | 1.6232 | 0.00830 |
| 13.25 | 0.9968 | 0.9822 to 0.9999 | 0.388  | 0.3442 to 0.4331 | 1.6288 | 0.00820 |
| 13.35 | 0.9968 | 0.9822 to 0.9999 | 0.39   | 0.3463 to 0.4352 | 1.6341 | 0.00820 |
| 13.37 | 0.9968 | 0.9822 to 0.9999 | 0.3921 | 0.3483 to 0.4373 | 1.6397 | 0.00820 |

|       |        |                  |        |                  |        |         |
|-------|--------|------------------|--------|------------------|--------|---------|
| 13.45 | 0.9968 | 0.9822 to 0.9999 | 0.3942 | 0.3503 to 0.4394 | 1.6454 | 0.00810 |
| 13.59 | 0.9968 | 0.9822 to 0.9999 | 0.3963 | 0.3523 to 0.4415 | 1.6512 | 0.00810 |
| 13.66 | 0.9968 | 0.9822 to 0.9999 | 0.3983 | 0.3543 to 0.4436 | 1.6566 | 0.00800 |
| 13.67 | 0.9968 | 0.9822 to 0.9999 | 0.4025 | 0.3584 to 0.4478 | 1.6683 | 0.00800 |
| 13.68 | 0.9968 | 0.9822 to 0.9999 | 0.4046 | 0.3604 to 0.4499 | 1.6742 | 0.00790 |
| 13.71 | 0.9968 | 0.9822 to 0.9999 | 0.4066 | 0.3624 to 0.4520 | 1.6798 | 0.00790 |
| 13.75 | 0.9968 | 0.9822 to 0.9999 | 0.4087 | 0.3645 to 0.4541 | 1.6858 | 0.00780 |
| 13.78 | 0.9968 | 0.9822 to 0.9999 | 0.4108 | 0.3665 to 0.4562 | 1.6918 | 0.00780 |
| 13.81 | 0.9968 | 0.9822 to 0.9999 | 0.4129 | 0.3685 to 0.4583 | 1.6978 | 0.00780 |
| 13.83 | 0.9968 | 0.9822 to 0.9999 | 0.4149 | 0.3706 to 0.4604 | 1.7036 | 0.00770 |
| 13.88 | 0.9968 | 0.9822 to 0.9999 | 0.417  | 0.3726 to 0.4625 | 1.7098 | 0.00770 |
| 13.96 | 0.9968 | 0.9822 to 0.9999 | 0.4191 | 0.3746 to 0.4646 | 1.716  | 0.00760 |
| 14.04 | 0.9968 | 0.9822 to 0.9999 | 0.4212 | 0.3766 to 0.4666 | 1.7222 | 0.00760 |
| 14.1  | 0.9968 | 0.9822 to 0.9999 | 0.4253 | 0.3807 to 0.4708 | 1.7345 | 0.00750 |
| 14.13 | 0.9968 | 0.9822 to 0.9999 | 0.4274 | 0.3827 to 0.4729 | 1.7408 | 0.00750 |
| 14.14 | 0.9968 | 0.9822 to 0.9999 | 0.4315 | 0.3868 to 0.4771 | 1.7534 | 0.00740 |
| 14.15 | 0.9968 | 0.9822 to 0.9999 | 0.4336 | 0.3889 to 0.4792 | 1.7599 | 0.00740 |
| 14.2  | 0.9968 | 0.9822 to 0.9999 | 0.4357 | 0.3909 to 0.4813 | 1.7664 | 0.00730 |
| 14.23 | 0.9968 | 0.9822 to 0.9999 | 0.4378 | 0.3929 to 0.4834 | 1.773  | 0.00730 |
| 14.25 | 0.9968 | 0.9822 to 0.9999 | 0.4398 | 0.3950 to 0.4854 | 1.7794 | 0.00730 |
| 14.34 | 0.9968 | 0.9822 to 0.9999 | 0.4419 | 0.3970 to 0.4875 | 1.7861 | 0.00720 |
| 14.42 | 0.9968 | 0.9822 to 0.9999 | 0.444  | 0.3991 to 0.4896 | 1.7928 | 0.00720 |
| 14.45 | 0.9968 | 0.9822 to 0.9999 | 0.4461 | 0.4011 to 0.4917 | 1.7996 | 0.00720 |
| 14.48 | 0.9968 | 0.9822 to 0.9999 | 0.4481 | 0.4031 to 0.4938 | 1.8061 | 0.00710 |
| 14.53 | 0.9968 | 0.9822 to 0.9999 | 0.4502 | 0.4052 to 0.4959 | 1.813  | 0.00710 |
| 14.57 | 0.9968 | 0.9822 to 0.9999 | 0.4523 | 0.4072 to 0.4979 | 1.82   | 0.00710 |
| 14.57 | 0.9968 | 0.9822 to 0.9999 | 0.4544 | 0.4093 to 0.5000 | 1.827  | 0.00700 |
| 14.58 | 0.9968 | 0.9822 to 0.9999 | 0.4564 | 0.4113 to 0.5021 | 1.8337 | 0.00700 |
| 14.65 | 0.9968 | 0.9822 to 0.9999 | 0.4585 | 0.4134 to 0.5042 | 1.8408 | 0.00700 |
| 14.72 | 0.9968 | 0.9822 to 0.9999 | 0.4606 | 0.4154 to 0.5062 | 1.848  | 0.00690 |
| 14.75 | 0.9968 | 0.9822 to 0.9999 | 0.4627 | 0.4175 to 0.5083 | 1.8552 | 0.00690 |
| 14.84 | 0.9968 | 0.9822 to 0.9999 | 0.4647 | 0.4195 to 0.5104 | 1.8621 | 0.00690 |
| 14.96 | 0.9968 | 0.9822 to 0.9999 | 0.4668 | 0.4216 to 0.5125 | 1.8695 | 0.00690 |
| 15.04 | 0.9968 | 0.9822 to 0.9999 | 0.4689 | 0.4236 to 0.5145 | 1.8769 | 0.00680 |
| 15.1  | 0.9968 | 0.9822 to 0.9999 | 0.471  | 0.4257 to 0.5166 | 1.8843 | 0.00680 |
| 15.14 | 0.9968 | 0.9822 to 0.9999 | 0.473  | 0.4277 to 0.5187 | 1.8915 | 0.00680 |
| 15.16 | 0.9968 | 0.9822 to 0.9999 | 0.4751 | 0.4298 to 0.5208 | 1.899  | 0.00670 |
| 15.19 | 0.9968 | 0.9822 to 0.9999 | 0.4772 | 0.4318 to 0.5228 | 1.9067 | 0.00670 |
| 15.2  | 0.9968 | 0.9822 to 0.9999 | 0.4793 | 0.4339 to 0.5249 | 1.9143 | 0.00670 |
| 15.22 | 0.9968 | 0.9822 to 0.9999 | 0.4834 | 0.4380 to 0.5290 | 1.9295 | 0.00660 |
| 15.24 | 0.9968 | 0.9822 to 0.9999 | 0.4855 | 0.4400 to 0.5311 | 1.9374 | 0.00660 |
| 15.28 | 0.9968 | 0.9822 to 0.9999 | 0.4876 | 0.4421 to 0.5332 | 1.9454 | 0.00660 |
| 15.34 | 0.9968 | 0.9822 to 0.9999 | 0.4896 | 0.4441 to 0.5352 | 1.953  | 0.00650 |
| 15.37 | 0.9968 | 0.9822 to 0.9999 | 0.4917 | 0.4462 to 0.5373 | 1.961  | 0.00650 |
| 15.41 | 0.9968 | 0.9822 to 0.9999 | 0.4938 | 0.4483 to 0.5394 | 1.9692 | 0.00650 |

|       |        |                  |        |                  |        |         |
|-------|--------|------------------|--------|------------------|--------|---------|
| 15.52 | 0.9968 | 0.9822 to 0.9999 | 0.4959 | 0.4503 to 0.5414 | 1.9774 | 0.00650 |
| 15.64 | 0.9968 | 0.9822 to 0.9999 | 0.4979 | 0.4524 to 0.5435 | 1.9853 | 0.00640 |
| 15.7  | 0.9968 | 0.9822 to 0.9999 | 0.5    | 0.4544 to 0.5456 | 1.9936 | 0.00640 |
| 15.72 | 0.9968 | 0.9822 to 0.9999 | 0.5021 | 0.4565 to 0.5476 | 2.002  | 0.00640 |
| 15.74 | 0.9968 | 0.9822 to 0.9999 | 0.5041 | 0.4586 to 0.5497 | 2.0101 | 0.00630 |
| 15.8  | 0.9968 | 0.9822 to 0.9999 | 0.5062 | 0.4606 to 0.5517 | 2.0186 | 0.00630 |
| 15.89 | 0.9968 | 0.9822 to 0.9999 | 0.5083 | 0.4627 to 0.5538 | 2.0273 | 0.00630 |
| 15.94 | 0.9968 | 0.9822 to 0.9999 | 0.5104 | 0.4648 to 0.5559 | 2.0359 | 0.00630 |
| 15.98 | 0.9968 | 0.9822 to 0.9999 | 0.5124 | 0.4668 to 0.5579 | 2.0443 | 0.00620 |
| 16.04 | 0.9968 | 0.9822 to 0.9999 | 0.5145 | 0.4689 to 0.5600 | 2.0531 | 0.00620 |
| 16.06 | 0.9968 | 0.9822 to 0.9999 | 0.5187 | 0.4730 to 0.5641 | 2.0711 | 0.00620 |
| 16.1  | 0.9968 | 0.9822 to 0.9999 | 0.5207 | 0.4751 to 0.5661 | 2.0797 | 0.00610 |
| 16.15 | 0.9968 | 0.9822 to 0.9999 | 0.5228 | 0.4772 to 0.5682 | 2.0889 | 0.00610 |
| 16.17 | 0.9968 | 0.9822 to 0.9999 | 0.5249 | 0.4792 to 0.5702 | 2.0981 | 0.00610 |
| 16.2  | 0.9968 | 0.9822 to 0.9999 | 0.527  | 0.4813 to 0.5723 | 2.1074 | 0.00610 |
| 16.24 | 0.9968 | 0.9822 to 0.9999 | 0.529  | 0.4834 to 0.5743 | 2.1163 | 0.00600 |
| 16.26 | 0.9968 | 0.9822 to 0.9999 | 0.5311 | 0.4855 to 0.5764 | 2.1258 | 0.00600 |
| 16.3  | 0.9968 | 0.9822 to 0.9999 | 0.5332 | 0.4875 to 0.5784 | 2.1354 | 0.00600 |
| 16.34 | 0.9968 | 0.9822 to 0.9999 | 0.5353 | 0.4896 to 0.5805 | 2.145  | 0.00600 |
| 16.35 | 0.9968 | 0.9822 to 0.9999 | 0.5373 | 0.4917 to 0.5825 | 2.1543 | 0.00600 |
| 16.37 | 0.9968 | 0.9822 to 0.9999 | 0.5394 | 0.4938 to 0.5846 | 2.1641 | 0.00590 |
| 16.4  | 0.9968 | 0.9822 to 0.9999 | 0.5415 | 0.4958 to 0.5866 | 2.174  | 0.00590 |
| 16.42 | 0.9968 | 0.9822 to 0.9999 | 0.5436 | 0.4979 to 0.5887 | 2.184  | 0.00590 |
| 16.44 | 0.9968 | 0.9822 to 0.9999 | 0.5456 | 0.5000 to 0.5907 | 2.1937 | 0.00590 |
| 16.48 | 0.9968 | 0.9822 to 0.9999 | 0.5477 | 0.5021 to 0.5928 | 2.2038 | 0.00580 |
| 16.51 | 0.9968 | 0.9822 to 0.9999 | 0.5498 | 0.5041 to 0.5948 | 2.2141 | 0.00580 |
| 16.57 | 0.9968 | 0.9822 to 0.9999 | 0.5519 | 0.5062 to 0.5969 | 2.2245 | 0.00580 |
| 16.62 | 0.9968 | 0.9822 to 0.9999 | 0.5539 | 0.5083 to 0.5989 | 2.2345 | 0.00580 |
| 16.66 | 0.9968 | 0.9822 to 0.9999 | 0.556  | 0.5104 to 0.6009 | 2.245  | 0.00580 |
| 16.7  | 0.9968 | 0.9822 to 0.9999 | 0.5581 | 0.5125 to 0.6030 | 2.2557 | 0.00570 |
| 16.71 | 0.9968 | 0.9822 to 0.9999 | 0.5602 | 0.5146 to 0.6050 | 2.2665 | 0.00570 |
| 16.79 | 0.9968 | 0.9822 to 0.9999 | 0.5622 | 0.5166 to 0.6071 | 2.2768 | 0.00570 |
| 16.88 | 0.9968 | 0.9822 to 0.9999 | 0.5643 | 0.5187 to 0.6091 | 2.2878 | 0.00570 |
| 16.89 | 0.9968 | 0.9822 to 0.9999 | 0.5664 | 0.5208 to 0.6111 | 2.2989 | 0.00560 |
| 16.93 | 0.9968 | 0.9822 to 0.9999 | 0.5685 | 0.5229 to 0.6132 | 2.3101 | 0.00560 |
| 16.97 | 0.9968 | 0.9822 to 0.9999 | 0.5705 | 0.5250 to 0.6152 | 2.3208 | 0.00560 |
| 17.01 | 0.9968 | 0.9822 to 0.9999 | 0.5726 | 0.5271 to 0.6173 | 2.3322 | 0.00560 |
| 17.09 | 0.9968 | 0.9822 to 0.9999 | 0.5747 | 0.5292 to 0.6193 | 2.3438 | 0.00560 |
| 17.14 | 0.9968 | 0.9822 to 0.9999 | 0.5768 | 0.5313 to 0.6213 | 2.3554 | 0.00550 |
| 17.17 | 0.9968 | 0.9822 to 0.9999 | 0.5788 | 0.5334 to 0.6234 | 2.3666 | 0.00550 |
| 17.2  | 0.9968 | 0.9822 to 0.9999 | 0.5809 | 0.5354 to 0.6254 | 2.3784 | 0.00550 |
| 17.24 | 0.9968 | 0.9822 to 0.9999 | 0.5851 | 0.5396 to 0.6294 | 2.4025 | 0.00550 |
| 17.26 | 0.9968 | 0.9822 to 0.9999 | 0.5871 | 0.5417 to 0.6315 | 2.4141 | 0.00550 |
| 17.32 | 0.9968 | 0.9822 to 0.9999 | 0.5892 | 0.5438 to 0.6335 | 2.4265 | 0.00540 |
| 17.41 | 0.9968 | 0.9822 to 0.9999 | 0.5913 | 0.5459 to 0.6355 | 2.439  | 0.00540 |

|       |        |                  |        |                  |        |         |
|-------|--------|------------------|--------|------------------|--------|---------|
| 17.48 | 0.9968 | 0.9822 to 0.9999 | 0.5934 | 0.5480 to 0.6376 | 2.4515 | 0.00540 |
| 17.53 | 0.9968 | 0.9822 to 0.9999 | 0.5954 | 0.5501 to 0.6396 | 2.4637 | 0.00540 |
| 17.57 | 0.9968 | 0.9822 to 0.9999 | 0.5975 | 0.5522 to 0.6416 | 2.4765 | 0.00540 |
| 17.62 | 0.9968 | 0.9822 to 0.9999 | 0.5996 | 0.5543 to 0.6436 | 2.4895 | 0.00530 |
| 17.67 | 0.9968 | 0.9822 to 0.9999 | 0.6017 | 0.5564 to 0.6457 | 2.5026 | 0.00530 |
| 17.71 | 0.9968 | 0.9822 to 0.9999 | 0.6037 | 0.5585 to 0.6477 | 2.5153 | 0.00530 |
| 17.75 | 0.9968 | 0.9822 to 0.9999 | 0.6058 | 0.5606 to 0.6497 | 2.5287 | 0.00530 |
| 17.81 | 0.9968 | 0.9822 to 0.9999 | 0.6079 | 0.5627 to 0.6517 | 2.5422 | 0.00530 |
| 17.84 | 0.9968 | 0.9822 to 0.9999 | 0.61   | 0.5648 to 0.6537 | 2.5559 | 0.00520 |
| 17.87 | 0.9968 | 0.9822 to 0.9999 | 0.612  | 0.5669 to 0.6558 | 2.5691 | 0.00520 |
| 17.88 | 0.9968 | 0.9822 to 0.9999 | 0.6141 | 0.5690 to 0.6578 | 2.5831 | 0.00520 |
| 17.91 | 0.9968 | 0.9822 to 0.9999 | 0.6162 | 0.5711 to 0.6598 | 2.5972 | 0.00520 |
| 17.97 | 0.9968 | 0.9822 to 0.9999 | 0.6183 | 0.5732 to 0.6618 | 2.6115 | 0.00520 |
| 18.01 | 0.9968 | 0.9822 to 0.9999 | 0.6203 | 0.5753 to 0.6638 | 2.6252 | 0.00520 |
| 18.03 | 0.9968 | 0.9822 to 0.9999 | 0.6224 | 0.5774 to 0.6659 | 2.6398 | 0.00510 |
| 18.05 | 0.9968 | 0.9822 to 0.9999 | 0.6245 | 0.5796 to 0.6679 | 2.6546 | 0.00510 |
| 18.07 | 0.9968 | 0.9822 to 0.9999 | 0.6266 | 0.5817 to 0.6699 | 2.6695 | 0.00510 |
| 18.09 | 0.9968 | 0.9822 to 0.9999 | 0.6286 | 0.5838 to 0.6719 | 2.6839 | 0.00510 |
| 18.12 | 0.9968 | 0.9822 to 0.9999 | 0.6307 | 0.5859 to 0.6739 | 2.6992 | 0.00510 |
| 18.15 | 0.9968 | 0.9822 to 0.9999 | 0.6328 | 0.5880 to 0.6759 | 2.7146 | 0.00510 |
| 18.17 | 0.9968 | 0.9822 to 0.9999 | 0.6349 | 0.5901 to 0.6779 | 2.7302 | 0.00500 |
| 18.2  | 0.9968 | 0.9822 to 0.9999 | 0.6369 | 0.5922 to 0.6799 | 2.7452 | 0.00500 |
| 18.24 | 0.9968 | 0.9822 to 0.9999 | 0.639  | 0.5943 to 0.6820 | 2.7612 | 0.00500 |
| 18.29 | 0.9968 | 0.9822 to 0.9999 | 0.6411 | 0.5965 to 0.6840 | 2.7774 | 0.00500 |
| 18.34 | 0.9968 | 0.9822 to 0.9999 | 0.6432 | 0.5986 to 0.6860 | 2.7937 | 0.00500 |
| 18.39 | 0.9968 | 0.9822 to 0.9999 | 0.6452 | 0.6007 to 0.6880 | 2.8095 | 0.00500 |
| 18.46 | 0.9968 | 0.9822 to 0.9999 | 0.6473 | 0.6028 to 0.6900 | 2.8262 | 0.00490 |
| 18.54 | 0.9968 | 0.9822 to 0.9999 | 0.6494 | 0.6049 to 0.6920 | 2.8431 | 0.00490 |
| 18.56 | 0.9968 | 0.9822 to 0.9999 | 0.6515 | 0.6070 to 0.6940 | 2.8603 | 0.00490 |
| 18.57 | 0.9968 | 0.9822 to 0.9999 | 0.6535 | 0.6092 to 0.6960 | 2.8768 | 0.00490 |
| 18.59 | 0.9968 | 0.9822 to 0.9999 | 0.6556 | 0.6113 to 0.6980 | 2.8943 | 0.00490 |
| 18.63 | 0.9968 | 0.9822 to 0.9999 | 0.6598 | 0.6155 to 0.7020 | 2.93   | 0.00480 |
| 18.73 | 0.9968 | 0.9822 to 0.9999 | 0.6618 | 0.6177 to 0.7040 | 2.9474 | 0.00480 |
| 18.85 | 0.9968 | 0.9822 to 0.9999 | 0.6639 | 0.6198 to 0.7060 | 2.9658 | 0.00480 |
| 18.9  | 0.9968 | 0.9822 to 0.9999 | 0.666  | 0.6219 to 0.7080 | 2.9844 | 0.00480 |
| 18.91 | 0.9968 | 0.9822 to 0.9999 | 0.668  | 0.6240 to 0.7100 | 3.0024 | 0.00480 |
| 18.92 | 0.9968 | 0.9822 to 0.9999 | 0.6701 | 0.6262 to 0.7120 | 3.0215 | 0.00480 |
| 18.96 | 0.9968 | 0.9822 to 0.9999 | 0.6722 | 0.6283 to 0.7140 | 3.0409 | 0.00480 |
| 18.99 | 0.9968 | 0.9822 to 0.9999 | 0.6743 | 0.6304 to 0.7160 | 3.0605 | 0.00470 |
| 19.05 | 0.9968 | 0.9822 to 0.9999 | 0.6763 | 0.6326 to 0.7180 | 3.0794 | 0.00470 |
| 19.22 | 0.9968 | 0.9822 to 0.9999 | 0.6784 | 0.6347 to 0.7200 | 3.0995 | 0.00470 |
| 19.36 | 0.9968 | 0.9822 to 0.9999 | 0.6805 | 0.6368 to 0.7219 | 3.1199 | 0.00470 |
| 19.4  | 0.9968 | 0.9822 to 0.9999 | 0.6826 | 0.6390 to 0.7239 | 3.1405 | 0.00470 |
| 19.49 | 0.9968 | 0.9822 to 0.9999 | 0.6846 | 0.6411 to 0.7259 | 3.1604 | 0.00470 |
| 19.62 | 0.9968 | 0.9822 to 0.9999 | 0.6867 | 0.6432 to 0.7279 | 3.1816 | 0.00470 |

|       |        |                  |        |                  |        |         |
|-------|--------|------------------|--------|------------------|--------|---------|
| 19.7  | 0.9968 | 0.9822 to 0.9999 | 0.6888 | 0.6454 to 0.7299 | 3.2031 | 0.00460 |
| 19.78 | 0.9968 | 0.9822 to 0.9999 | 0.6909 | 0.6475 to 0.7319 | 3.2248 | 0.00460 |
| 19.85 | 0.9968 | 0.9822 to 0.9999 | 0.6929 | 0.6496 to 0.7339 | 3.2458 | 0.00460 |
| 19.88 | 0.9968 | 0.9822 to 0.9999 | 0.695  | 0.6518 to 0.7359 | 3.2682 | 0.00460 |
| 19.91 | 0.9968 | 0.9822 to 0.9999 | 0.6971 | 0.6539 to 0.7378 | 3.2909 | 0.00460 |
| 19.93 | 0.9968 | 0.9822 to 0.9999 | 0.6992 | 0.6561 to 0.7398 | 3.3138 | 0.00460 |
| 20.04 | 0.9968 | 0.9822 to 0.9999 | 0.7012 | 0.6582 to 0.7418 | 3.336  | 0.00460 |
| 20.12 | 0.9968 | 0.9822 to 0.9999 | 0.7033 | 0.6603 to 0.7438 | 3.3596 | 0.00450 |
| 20.15 | 0.9968 | 0.9822 to 0.9999 | 0.7054 | 0.6625 to 0.7458 | 3.3836 | 0.00450 |
| 20.19 | 0.9968 | 0.9822 to 0.9999 | 0.7075 | 0.6646 to 0.7477 | 3.4079 | 0.00450 |
| 20.2  | 0.9968 | 0.9822 to 0.9999 | 0.7095 | 0.6668 to 0.7497 | 3.4313 | 0.00450 |
| 20.28 | 0.9935 | 0.9769 to 0.9992 | 0.7095 | 0.6668 to 0.7497 | 3.42   | 0.00920 |
| 20.35 | 0.9935 | 0.9769 to 0.9992 | 0.7137 | 0.6711 to 0.7537 | 3.4701 | 0.00910 |
| 20.36 | 0.9935 | 0.9769 to 0.9992 | 0.7158 | 0.6732 to 0.7556 | 3.4958 | 0.00910 |
| 20.4  | 0.9935 | 0.9769 to 0.9992 | 0.7178 | 0.6754 to 0.7576 | 3.5206 | 0.00910 |
| 20.48 | 0.9935 | 0.9769 to 0.9992 | 0.7199 | 0.6775 to 0.7596 | 3.5469 | 0.00900 |
| 20.68 | 0.9935 | 0.9769 to 0.9992 | 0.722  | 0.6797 to 0.7616 | 3.5737 | 0.00900 |
| 20.88 | 0.9935 | 0.9769 to 0.9992 | 0.7241 | 0.6818 to 0.7635 | 3.6009 | 0.00900 |
| 20.94 | 0.9935 | 0.9769 to 0.9992 | 0.7261 | 0.6840 to 0.7655 | 3.6272 | 0.00900 |
| 20.95 | 0.9935 | 0.9769 to 0.9992 | 0.7282 | 0.6861 to 0.7675 | 3.6553 | 0.00890 |
| 20.96 | 0.9935 | 0.9769 to 0.9992 | 0.7303 | 0.6883 to 0.7694 | 3.6837 | 0.00890 |
| 20.98 | 0.9935 | 0.9769 to 0.9992 | 0.7344 | 0.6926 to 0.7734 | 3.7406 | 0.00890 |
| 21    | 0.9935 | 0.9769 to 0.9992 | 0.7386 | 0.6969 to 0.7773 | 3.8007 | 0.00880 |
| 21.1  | 0.9935 | 0.9769 to 0.9992 | 0.7407 | 0.6991 to 0.7792 | 3.8315 | 0.00880 |
| 21.21 | 0.9935 | 0.9769 to 0.9992 | 0.7427 | 0.7013 to 0.7812 | 3.8613 | 0.00880 |
| 21.22 | 0.9935 | 0.9769 to 0.9992 | 0.7448 | 0.7034 to 0.7832 | 3.893  | 0.00870 |
| 21.32 | 0.9935 | 0.9769 to 0.9992 | 0.7469 | 0.7056 to 0.7851 | 3.9253 | 0.00870 |
| 21.44 | 0.9935 | 0.9769 to 0.9992 | 0.749  | 0.7078 to 0.7871 | 3.9582 | 0.00870 |
| 21.54 | 0.9935 | 0.9769 to 0.9992 | 0.751  | 0.7099 to 0.7890 | 3.99   | 0.00870 |
| 21.68 | 0.9935 | 0.9769 to 0.9992 | 0.7531 | 0.7121 to 0.7910 | 4.0239 | 0.00860 |
| 21.76 | 0.9935 | 0.9769 to 0.9992 | 0.7552 | 0.7143 to 0.7929 | 4.0584 | 0.00860 |
| 21.82 | 0.9935 | 0.9769 to 0.9992 | 0.7573 | 0.7164 to 0.7949 | 4.0935 | 0.00860 |
| 21.87 | 0.9935 | 0.9769 to 0.9992 | 0.7593 | 0.7186 to 0.7968 | 4.1275 | 0.00860 |
| 21.9  | 0.9935 | 0.9769 to 0.9992 | 0.7614 | 0.7208 to 0.7988 | 4.1639 | 0.00850 |
| 21.96 | 0.9935 | 0.9769 to 0.9992 | 0.7635 | 0.7230 to 0.8007 | 4.2008 | 0.00850 |
| 22    | 0.9935 | 0.9769 to 0.9992 | 0.7676 | 0.7273 to 0.8046 | 4.275  | 0.00850 |
| 22.08 | 0.9935 | 0.9769 to 0.9992 | 0.7697 | 0.7295 to 0.8066 | 4.3139 | 0.00840 |
| 22.15 | 0.9935 | 0.9769 to 0.9992 | 0.7718 | 0.7317 to 0.8085 | 4.3536 | 0.00840 |
| 22.17 | 0.9935 | 0.9769 to 0.9992 | 0.7739 | 0.7339 to 0.8105 | 4.3941 | 0.00840 |
| 22.21 | 0.9935 | 0.9769 to 0.9992 | 0.7759 | 0.7360 to 0.8124 | 4.4333 | 0.00840 |
| 22.23 | 0.9935 | 0.9769 to 0.9992 | 0.778  | 0.7382 to 0.8143 | 4.4752 | 0.00840 |
| 22.28 | 0.9935 | 0.9769 to 0.9992 | 0.7801 | 0.7404 to 0.8163 | 4.518  | 0.00830 |
| 22.33 | 0.9935 | 0.9769 to 0.9992 | 0.7822 | 0.7426 to 0.8182 | 4.5615 | 0.00830 |
| 22.35 | 0.9935 | 0.9769 to 0.9992 | 0.7842 | 0.7448 to 0.8202 | 4.6038 | 0.00830 |
| 22.47 | 0.9935 | 0.9769 to 0.9992 | 0.7863 | 0.7470 to 0.8221 | 4.649  | 0.00830 |



|       |        |                  |        |                  |        |         |
|-------|--------|------------------|--------|------------------|--------|---------|
| 22.6  | 0.9935 | 0.9769 to 0.9992 | 0.7884 | 0.7492 to 0.8240 | 4.6952 | 0.00820 |
| 22.72 | 0.9935 | 0.9769 to 0.9992 | 0.7905 | 0.7514 to 0.8260 | 4.7422 | 0.00820 |
| 22.9  | 0.9935 | 0.9769 to 0.9992 | 0.7925 | 0.7535 to 0.8279 | 4.788  | 0.00820 |
| 23.06 | 0.9935 | 0.9769 to 0.9992 | 0.7946 | 0.7557 to 0.8298 | 4.8369 | 0.00820 |
| 23.2  | 0.9935 | 0.9769 to 0.9992 | 0.7988 | 0.7601 to 0.8337 | 4.9379 | 0.00810 |
| 23.27 | 0.9935 | 0.9769 to 0.9992 | 0.8008 | 0.7623 to 0.8356 | 4.9874 | 0.00810 |
| 23.34 | 0.9935 | 0.9769 to 0.9992 | 0.8029 | 0.7645 to 0.8375 | 5.0406 | 0.00810 |
| 23.41 | 0.9935 | 0.9769 to 0.9992 | 0.805  | 0.7667 to 0.8394 | 5.0949 | 0.00810 |
| 23.45 | 0.9935 | 0.9769 to 0.9992 | 0.8071 | 0.7689 to 0.8413 | 5.1503 | 0.00810 |
| 23.53 | 0.9935 | 0.9769 to 0.9992 | 0.8091 | 0.7712 to 0.8433 | 5.2043 | 0.00800 |
| 23.6  | 0.9935 | 0.9769 to 0.9992 | 0.8112 | 0.7734 to 0.8452 | 5.2622 | 0.00800 |
| 23.64 | 0.9935 | 0.9769 to 0.9992 | 0.8133 | 0.7756 to 0.8471 | 5.3214 | 0.00800 |
| 23.7  | 0.9935 | 0.9769 to 0.9992 | 0.8154 | 0.7778 to 0.8490 | 5.3819 | 0.00800 |
| 23.74 | 0.9935 | 0.9769 to 0.9992 | 0.8174 | 0.7800 to 0.8509 | 5.4409 | 0.00800 |
| 23.79 | 0.9935 | 0.9769 to 0.9992 | 0.8195 | 0.7822 to 0.8528 | 5.5042 | 0.00790 |
| 23.87 | 0.9935 | 0.9769 to 0.9992 | 0.8216 | 0.7844 to 0.8547 | 5.5689 | 0.00790 |
| 24    | 0.9935 | 0.9769 to 0.9992 | 0.8237 | 0.7866 to 0.8566 | 5.6353 | 0.00790 |
| 24.08 | 0.9935 | 0.9769 to 0.9992 | 0.8257 | 0.7889 to 0.8585 | 5.6999 | 0.00790 |
| 24.13 | 0.9935 | 0.9769 to 0.9992 | 0.8278 | 0.7911 to 0.8604 | 5.7695 | 0.00790 |
| 24.18 | 0.9935 | 0.9769 to 0.9992 | 0.832  | 0.7955 to 0.8642 | 5.9137 | 0.00780 |
| 24.21 | 0.9935 | 0.9769 to 0.9992 | 0.834  | 0.7977 to 0.8661 | 5.9849 | 0.00780 |
| 24.38 | 0.9935 | 0.9769 to 0.9992 | 0.8361 | 0.8000 to 0.8680 | 6.0616 | 0.00780 |
| 24.58 | 0.9935 | 0.9769 to 0.9992 | 0.8382 | 0.8022 to 0.8699 | 6.1403 | 0.00780 |
| 24.73 | 0.9935 | 0.9769 to 0.9992 | 0.8402 | 0.8044 to 0.8718 | 6.2171 | 0.00770 |
| 24.88 | 0.9935 | 0.9769 to 0.9992 | 0.8423 | 0.8067 to 0.8737 | 6.2999 | 0.00770 |
| 24.96 | 0.9935 | 0.9769 to 0.9992 | 0.8444 | 0.8089 to 0.8756 | 6.385  | 0.00770 |
| 25.05 | 0.9935 | 0.9769 to 0.9992 | 0.8465 | 0.8111 to 0.8775 | 6.4723 | 0.00770 |
| 25.15 | 0.9935 | 0.9769 to 0.9992 | 0.8485 | 0.8134 to 0.8794 | 6.5578 | 0.00770 |
| 25.26 | 0.9935 | 0.9769 to 0.9992 | 0.8506 | 0.8156 to 0.8812 | 6.6499 | 0.00760 |
| 25.43 | 0.9935 | 0.9769 to 0.9992 | 0.8527 | 0.8179 to 0.8831 | 6.7447 | 0.00760 |
| 25.55 | 0.9903 | 0.9720 to 0.9980 | 0.8527 | 0.8179 to 0.8831 | 6.723  | 0.0114  |
| 25.65 | 0.9903 | 0.9720 to 0.9980 | 0.8548 | 0.8201 to 0.8850 | 6.8202 | 0.0113  |
| 25.8  | 0.9903 | 0.9720 to 0.9980 | 0.8568 | 0.8224 to 0.8869 | 6.9155 | 0.0113  |
| 25.9  | 0.9903 | 0.9720 to 0.9980 | 0.8589 | 0.8246 to 0.8888 | 7.0184 | 0.0113  |
| 25.92 | 0.9903 | 0.9720 to 0.9980 | 0.861  | 0.8269 to 0.8906 | 7.1245 | 0.0113  |
| 25.94 | 0.9903 | 0.9720 to 0.9980 | 0.8631 | 0.8291 to 0.8925 | 7.2337 | 0.0112  |
| 25.98 | 0.9903 | 0.9720 to 0.9980 | 0.8651 | 0.8314 to 0.8944 | 7.341  | 0.0112  |
| 26.1  | 0.9903 | 0.9720 to 0.9980 | 0.8672 | 0.8336 to 0.8962 | 7.4571 | 0.0112  |
| 26.21 | 0.9903 | 0.9720 to 0.9980 | 0.8693 | 0.8359 to 0.8981 | 7.5769 | 0.0112  |
| 26.27 | 0.9903 | 0.9720 to 0.9980 | 0.8714 | 0.8382 to 0.8999 | 7.7006 | 0.0111  |
| 26.46 | 0.9903 | 0.9720 to 0.9980 | 0.8734 | 0.8404 to 0.9018 | 7.8223 | 0.0111  |
| 26.84 | 0.9903 | 0.9720 to 0.9980 | 0.8755 | 0.8427 to 0.9036 | 7.9542 | 0.0111  |
| 27.09 | 0.9903 | 0.9720 to 0.9980 | 0.8776 | 0.8450 to 0.9055 | 8.0907 | 0.0111  |
| 27.12 | 0.9903 | 0.9720 to 0.9980 | 0.8797 | 0.8472 to 0.9073 | 8.2319 | 0.011   |
| 27.28 | 0.9903 | 0.9720 to 0.9980 | 0.8817 | 0.8495 to 0.9092 | 8.3711 | 0.011   |

|       |        |                  |        |                  |         |        |
|-------|--------|------------------|--------|------------------|---------|--------|
| 27.44 | 0.9903 | 0.9720 to 0.9980 | 0.8838 | 0.8518 to 0.9110 | 8.5224  | 0.011  |
| 27.51 | 0.9903 | 0.9720 to 0.9980 | 0.8859 | 0.8541 to 0.9129 | 8.6792  | 0.0109 |
| 27.64 | 0.9871 | 0.9673 to 0.9965 | 0.8859 | 0.8541 to 0.9129 | 8.6512  | 0.0146 |
| 27.77 | 0.9871 | 0.9673 to 0.9965 | 0.89   | 0.8586 to 0.9165 | 8.9736  | 0.0145 |
| 27.82 | 0.9871 | 0.9673 to 0.9965 | 0.8921 | 0.8609 to 0.9184 | 9.1483  | 0.0145 |
| 27.94 | 0.9871 | 0.9673 to 0.9965 | 0.8942 | 0.8632 to 0.9202 | 9.3299  | 0.0144 |
| 28.03 | 0.9871 | 0.9673 to 0.9965 | 0.8963 | 0.8655 to 0.9220 | 9.5188  | 0.0144 |
| 28.13 | 0.9871 | 0.9673 to 0.9965 | 0.8983 | 0.8678 to 0.9238 | 9.706   | 0.0144 |
| 28.23 | 0.9871 | 0.9673 to 0.9965 | 0.9004 | 0.8701 to 0.9257 | 9.9106  | 0.0143 |
| 28.4  | 0.9871 | 0.9673 to 0.9965 | 0.9025 | 0.8724 to 0.9275 | 10.1241 | 0.0143 |
| 28.72 | 0.9871 | 0.9673 to 0.9965 | 0.9046 | 0.8748 to 0.9293 | 10.347  | 0.0143 |
| 28.88 | 0.9871 | 0.9673 to 0.9965 | 0.9066 | 0.8771 to 0.9311 | 10.5685 | 0.0142 |
| 28.89 | 0.9871 | 0.9673 to 0.9965 | 0.9087 | 0.8794 to 0.9329 | 10.8116 | 0.0142 |
| 28.93 | 0.9871 | 0.9673 to 0.9965 | 0.9108 | 0.8817 to 0.9347 | 11.0661 | 0.0142 |
| 29.03 | 0.9871 | 0.9673 to 0.9965 | 0.9129 | 0.8840 to 0.9365 | 11.333  | 0.0141 |
| 29.12 | 0.9871 | 0.9673 to 0.9965 | 0.9149 | 0.8864 to 0.9383 | 11.5993 | 0.0141 |
| 29.22 | 0.9871 | 0.9673 to 0.9965 | 0.917  | 0.8887 to 0.9401 | 11.8928 | 0.0141 |
| 29.41 | 0.9838 | 0.9628 to 0.9947 | 0.917  | 0.8887 to 0.9401 | 11.853  | 0.0177 |
| 29.53 | 0.9838 | 0.9628 to 0.9947 | 0.9191 | 0.8910 to 0.9418 | 12.1607 | 0.0176 |
| 29.6  | 0.9838 | 0.9628 to 0.9947 | 0.9212 | 0.8934 to 0.9436 | 12.4848 | 0.0176 |
| 29.66 | 0.9838 | 0.9628 to 0.9947 | 0.9232 | 0.8957 to 0.9454 | 12.8099 | 0.0175 |
| 29.73 | 0.9838 | 0.9628 to 0.9947 | 0.9253 | 0.8981 to 0.9471 | 13.17   | 0.0175 |
| 29.84 | 0.9838 | 0.9628 to 0.9947 | 0.9274 | 0.9005 to 0.9489 | 13.551  | 0.0175 |
| 29.89 | 0.9838 | 0.9628 to 0.9947 | 0.9295 | 0.9028 to 0.9507 | 13.9546 | 0.0174 |
| 29.97 | 0.9838 | 0.9628 to 0.9947 | 0.9315 | 0.9052 to 0.9524 | 14.362  | 0.0174 |
| 30.05 | 0.9838 | 0.9628 to 0.9947 | 0.9336 | 0.9076 to 0.9541 | 14.8163 | 0.0174 |
| 30.31 | 0.9838 | 0.9628 to 0.9947 | 0.9357 | 0.9099 to 0.9559 | 15.3002 | 0.0173 |
| 30.58 | 0.9838 | 0.9628 to 0.9947 | 0.9378 | 0.9123 to 0.9576 | 15.8167 | 0.0173 |
| 31.02 | 0.9838 | 0.9628 to 0.9947 | 0.9398 | 0.9147 to 0.9593 | 16.3422 | 0.0172 |
| 31.66 | 0.9838 | 0.9628 to 0.9947 | 0.9419 | 0.9171 to 0.9611 | 16.9329 | 0.0172 |
| 31.95 | 0.9838 | 0.9628 to 0.9947 | 0.944  | 0.9195 to 0.9628 | 17.5679 | 0.0172 |
| 32    | 0.9838 | 0.9628 to 0.9947 | 0.9461 | 0.9220 to 0.9645 | 18.2523 | 0.0171 |
| 32.04 | 0.9838 | 0.9628 to 0.9947 | 0.9481 | 0.9244 to 0.9662 | 18.9557 | 0.0171 |
| 32.12 | 0.9838 | 0.9628 to 0.9947 | 0.9502 | 0.9268 to 0.9678 | 19.755  | 0.017  |
| 32.31 | 0.9838 | 0.9628 to 0.9947 | 0.9523 | 0.9293 to 0.9695 | 20.6247 | 0.017  |
| 32.59 | 0.9838 | 0.9628 to 0.9947 | 0.9544 | 0.9317 to 0.9712 | 21.5746 | 0.017  |
| 32.73 | 0.9838 | 0.9628 to 0.9947 | 0.9564 | 0.9342 to 0.9728 | 22.5642 | 0.0169 |
| 32.8  | 0.9838 | 0.9628 to 0.9947 | 0.9585 | 0.9366 to 0.9745 | 23.706  | 0.0169 |
| 33.02 | 0.9806 | 0.9584 to 0.9929 | 0.9585 | 0.9366 to 0.9745 | 23.6289 | 0.0202 |
| 33.23 | 0.9806 | 0.9584 to 0.9929 | 0.9606 | 0.9391 to 0.9761 | 24.8883 | 0.0202 |
| 33.33 | 0.9806 | 0.9584 to 0.9929 | 0.9627 | 0.9416 to 0.9777 | 26.2895 | 0.0202 |
| 33.43 | 0.9806 | 0.9584 to 0.9929 | 0.9647 | 0.9441 to 0.9793 | 27.779  | 0.0201 |
| 33.69 | 0.9806 | 0.9584 to 0.9929 | 0.9668 | 0.9467 to 0.9809 | 29.5361 | 0.0201 |
| 34.15 | 0.9806 | 0.9584 to 0.9929 | 0.9689 | 0.9492 to 0.9825 | 31.5305 | 0.02   |
| 34.64 | 0.9806 | 0.9584 to 0.9929 | 0.971  | 0.9517 to 0.9840 | 33.8138 | 0.02   |

|              |               |                         |              |                         |                |               |
|--------------|---------------|-------------------------|--------------|-------------------------|----------------|---------------|
| 34.96        | 0.9806        | 0.9584 to 0.9929        | 0.973        | 0.9543 to 0.9856        | 36.3185        | 0.0199        |
| <b>35.08</b> | <b>0.9773</b> | <b>0.9540 to 0.9909</b> | <b>0.973</b> | <b>0.9543 to 0.9856</b> | <b>36.1963</b> | <b>0.0233</b> |
| 35.15        | 0.9773        | 0.9540 to 0.9909        | 0.9751       | 0.9569 to 0.9871        | 39.249         | 0.0233        |
| 35.31        | 0.9773        | 0.9540 to 0.9909        | 0.9772       | 0.9595 to 0.9886        | 42.864         | 0.0232        |
| 35.55        | 0.9773        | 0.9540 to 0.9909        | 0.9793       | 0.9622 to 0.9900        | 47.2126        | 0.0232        |
| 35.91        | 0.9773        | 0.9540 to 0.9909        | 0.9813       | 0.9649 to 0.9914        | 52.262         | 0.0231        |
| 36.35        | 0.9741        | 0.9498 to 0.9888        | 0.9813       | 0.9649 to 0.9914        | 52.0909        | 0.0264        |
| 36.62        | 0.9709        | 0.9456 to 0.9866        | 0.9813       | 0.9649 to 0.9914        | 51.9198        | 0.0297        |
| 37.04        | 0.9709        | 0.9456 to 0.9866        | 0.9834       | 0.9676 to 0.9928        | 58.488         | 0.0296        |
| 37.49        | 0.9676        | 0.9415 to 0.9844        | 0.9834       | 0.9676 to 0.9928        | 58.2892        | 0.0329        |
| 37.62        | 0.9676        | 0.9415 to 0.9844        | 0.9855       | 0.9703 to 0.9941        | 66.731         | 0.0329        |
| 37.69        | 0.9676        | 0.9415 to 0.9844        | 0.9876       | 0.9731 to 0.9954        | 78.0323        | 0.0328        |
| 37.9         | 0.9676        | 0.9415 to 0.9844        | 0.9896       | 0.9760 to 0.9966        | 93.0385        | 0.0327        |
| 38.17        | 0.9644        | 0.9374 to 0.9822        | 0.9896       | 0.9760 to 0.9966        | 92.7308        | 0.036         |
| 38.32        | 0.9644        | 0.9374 to 0.9822        | 0.9917       | 0.9789 to 0.9977        | 116.1928       | 0.0359        |
| 38.42        | 0.9644        | 0.9374 to 0.9822        | 0.9938       | 0.9819 to 0.9987        | 155.5484       | 0.0358        |
| 39.01        | 0.9612        | 0.9334 to 0.9798        | 0.9938       | 0.9819 to 0.9987        | 155.0323       | 0.039         |
| 39.58        | 0.9579        | 0.9294 to 0.9775        | 0.9938       | 0.9819 to 0.9987        | 154.5          | 0.0424        |
| 40.08        | 0.9547        | 0.9254 to 0.9751        | 0.9938       | 0.9819 to 0.9987        | 153.9839       | 0.0456        |
| 40.94        | 0.9515        | 0.9214 to 0.9727        | 0.9938       | 0.9819 to 0.9987        | 153.4677       | 0.0488        |
| 41.67        | 0.9515        | 0.9214 to 0.9727        | 0.9959       | 0.9851 to 0.9995        | 232.0732       | 0.0487        |
| 42.19        | 0.9482        | 0.9175 to 0.9702        | 0.9959       | 0.9851 to 0.9995        | 231.2683       | 0.052         |
| 42.92        | 0.945         | 0.9136 to 0.9677        | 0.9959       | 0.9851 to 0.9995        | 230.4878       | 0.0552        |
| 43.93        | 0.9417        | 0.9098 to 0.9652        | 0.9959       | 0.9851 to 0.9995        | 229.6829       | 0.0585        |
| 44.95        | 0.9385        | 0.9059 to 0.9627        | 0.9959       | 0.9851 to 0.9995        | 228.9024       | 0.0618        |
| 45.53        | 0.9353        | 0.9021 to 0.9601        | 0.9959       | 0.9851 to 0.9995        | 228.122        | 0.065         |
| 45.74        | 0.932         | 0.8983 to 0.9576        | 0.9959       | 0.9851 to 0.9995        | 227.3171       | 0.0683        |
| 46.98        | 0.9288        | 0.8945 to 0.9550        | 0.9959       | 0.9851 to 0.9995        | 226.5366       | 0.0715        |
| 48.39        | 0.9256        | 0.8908 to 0.9524        | 0.9959       | 0.9851 to 0.9995        | 225.7561       | 0.0747        |
| 49.14        | 0.9223        | 0.8870 to 0.9498        | 0.9959       | 0.9851 to 0.9995        | 224.9512       | 0.078         |
| 49.57        | 0.9191        | 0.8833 to 0.9471        | 0.9959       | 0.9851 to 0.9995        | 224.1707       | 0.0812        |
| 50.17        | 0.9159        | 0.8795 to 0.9445        | 0.9959       | 0.9851 to 0.9995        | 223.3902       | 0.0844        |
| 51.27        | 0.9159        | 0.8795 to 0.9445        | 0.9979       | 0.9885 to 0.9999        | 436.1429       | 0.0843        |
| 51.78        | 0.9126        | 0.8758 to 0.9418        | 0.9979       | 0.9885 to 0.9999        | 434.5714       | 0.0876        |
| 51.92        | 0.9094        | 0.8721 to 0.9391        | 0.9979       | 0.9885 to 0.9999        | 433.0476       | 0.0908        |
| 53.03        | 0.9094        | 0.8721 to 0.9391        | 1            | 0.9924 to 1.000         |                | 0.0906        |
| 54.12        | 0.9061        | 0.8684 to 0.9365        | 1            | 0.9924 to 1.000         |                | 0.0939        |
| 56.7         | 0.9029        | 0.8647 to 0.9338        | 1            | 0.9924 to 1.000         |                | 0.0971        |
| 59.21        | 0.8997        | 0.8611 to 0.9310        | 1            | 0.9924 to 1.000         |                | 0.1003        |
| 59.4         | 0.8964        | 0.8574 to 0.9283        | 1            | 0.9924 to 1.000         |                | 0.1036        |
| 59.71        | 0.8932        | 0.8538 to 0.9256        | 1            | 0.9924 to 1.000         |                | 0.1068        |
| 60.43        | 0.89          | 0.8501 to 0.9228        | 1            | 0.9924 to 1.000         |                | 0.11          |
| 61           | 0.8867        | 0.8465 to 0.9201        | 1            | 0.9924 to 1.000         |                | 0.1133        |
| 61.53        | 0.8835        | 0.8429 to 0.9173        | 1            | 0.9924 to 1.000         |                | 0.1165        |
| 62.12        | 0.8803        | 0.8393 to 0.9146        | 1            | 0.9924 to 1.000         |                | 0.1197        |

|       |        |                  |   |                 |        |
|-------|--------|------------------|---|-----------------|--------|
| 62.21 | 0.877  | 0.8356 to 0.9118 | 1 | 0.9924 to 1.000 | 0.123  |
| 62.67 | 0.8738 | 0.8321 to 0.9090 | 1 | 0.9924 to 1.000 | 0.1262 |
| 63.15 | 0.8706 | 0.8285 to 0.9062 | 1 | 0.9924 to 1.000 | 0.1294 |
| 63.23 | 0.8673 | 0.8249 to 0.9034 | 1 | 0.9924 to 1.000 | 0.1327 |
| 63.24 | 0.8641 | 0.8213 to 0.9006 | 1 | 0.9924 to 1.000 | 0.1359 |
| 63.58 | 0.8608 | 0.8177 to 0.8978 | 1 | 0.9924 to 1.000 | 0.1392 |
| 64.29 | 0.8576 | 0.8142 to 0.8949 | 1 | 0.9924 to 1.000 | 0.1424 |
| 64.93 | 0.8544 | 0.8106 to 0.8921 | 1 | 0.9924 to 1.000 | 0.1456 |
| 65.21 | 0.8511 | 0.8071 to 0.8893 | 1 | 0.9924 to 1.000 | 0.1489 |
| 65.4  | 0.8479 | 0.8035 to 0.8864 | 1 | 0.9924 to 1.000 | 0.1521 |
| 65.62 | 0.8447 | 0.8000 to 0.8836 | 1 | 0.9924 to 1.000 | 0.1553 |
| 65.83 | 0.8414 | 0.7965 to 0.8807 | 1 | 0.9924 to 1.000 | 0.1586 |
| 66.35 | 0.8382 | 0.7929 to 0.8779 | 1 | 0.9924 to 1.000 | 0.1618 |
| 66.83 | 0.835  | 0.7894 to 0.8750 | 1 | 0.9924 to 1.000 | 0.165  |
| 67.17 | 0.8317 | 0.7859 to 0.8721 | 1 | 0.9924 to 1.000 | 0.1683 |
| 67.79 | 0.8285 | 0.7824 to 0.8692 | 1 | 0.9924 to 1.000 | 0.1715 |
| 68.8  | 0.8252 | 0.7789 to 0.8663 | 1 | 0.9924 to 1.000 | 0.1748 |
| 69.63 | 0.822  | 0.7754 to 0.8635 | 1 | 0.9924 to 1.000 | 0.178  |
| 69.89 | 0.8188 | 0.7719 to 0.8606 | 1 | 0.9924 to 1.000 | 0.1812 |
| 70.08 | 0.8123 | 0.7650 to 0.8548 | 1 | 0.9924 to 1.000 | 0.1877 |
| 70.28 | 0.8091 | 0.7615 to 0.8518 | 1 | 0.9924 to 1.000 | 0.1909 |
| 70.56 | 0.8058 | 0.7580 to 0.8489 | 1 | 0.9924 to 1.000 | 0.1942 |
| 70.78 | 0.8026 | 0.7545 to 0.8460 | 1 | 0.9924 to 1.000 | 0.1974 |
| 71.12 | 0.7994 | 0.7511 to 0.8431 | 1 | 0.9924 to 1.000 | 0.2006 |
| 71.46 | 0.7961 | 0.7476 to 0.8402 | 1 | 0.9924 to 1.000 | 0.2039 |
| 72.45 | 0.7929 | 0.7442 to 0.8372 | 1 | 0.9924 to 1.000 | 0.2071 |
| 73.95 | 0.7896 | 0.7407 to 0.8343 | 1 | 0.9924 to 1.000 | 0.2104 |
| 74.51 | 0.7864 | 0.7373 to 0.8313 | 1 | 0.9924 to 1.000 | 0.2136 |
| 74.7  | 0.7832 | 0.7338 to 0.8284 | 1 | 0.9924 to 1.000 | 0.2168 |
| 74.98 | 0.7799 | 0.7304 to 0.8254 | 1 | 0.9924 to 1.000 | 0.2201 |
| 75.11 | 0.7767 | 0.7270 to 0.8225 | 1 | 0.9924 to 1.000 | 0.2233 |
| 75.23 | 0.7735 | 0.7235 to 0.8195 | 1 | 0.9924 to 1.000 | 0.2265 |
| 75.49 | 0.7702 | 0.7201 to 0.8166 | 1 | 0.9924 to 1.000 | 0.2298 |
| 75.81 | 0.767  | 0.7167 to 0.8136 | 1 | 0.9924 to 1.000 | 0.233  |
| 76.07 | 0.7638 | 0.7133 to 0.8106 | 1 | 0.9924 to 1.000 | 0.2362 |
| 76.24 | 0.7605 | 0.7099 to 0.8077 | 1 | 0.9924 to 1.000 | 0.2395 |
| 76.42 | 0.7573 | 0.7064 to 0.8047 | 1 | 0.9924 to 1.000 | 0.2427 |
| 76.83 | 0.754  | 0.7030 to 0.8017 | 1 | 0.9924 to 1.000 | 0.246  |
| 77.45 | 0.7508 | 0.6996 to 0.7987 | 1 | 0.9924 to 1.000 | 0.2492 |
| 77.9  | 0.7476 | 0.6962 to 0.7957 | 1 | 0.9924 to 1.000 | 0.2524 |
| 78.23 | 0.7443 | 0.6928 to 0.7927 | 1 | 0.9924 to 1.000 | 0.2557 |
| 78.64 | 0.7411 | 0.6894 to 0.7897 | 1 | 0.9924 to 1.000 | 0.2589 |
| 78.9  | 0.7379 | 0.6861 to 0.7867 | 1 | 0.9924 to 1.000 | 0.2621 |
| 79.43 | 0.7346 | 0.6827 to 0.7837 | 1 | 0.9924 to 1.000 | 0.2654 |
| 79.89 | 0.7314 | 0.6793 to 0.7807 | 1 | 0.9924 to 1.000 | 0.2686 |

|       |        |                  |   |                 |        |
|-------|--------|------------------|---|-----------------|--------|
| 79.98 | 0.7282 | 0.6759 to 0.7777 | 1 | 0.9924 to 1.000 | 0.2718 |
| 80.12 | 0.7249 | 0.6725 to 0.7747 | 1 | 0.9924 to 1.000 | 0.2751 |
| 80.24 | 0.7217 | 0.6692 to 0.7717 | 1 | 0.9924 to 1.000 | 0.2783 |
| 80.63 | 0.7184 | 0.6658 to 0.7687 | 1 | 0.9924 to 1.000 | 0.2816 |
| 81.05 | 0.7152 | 0.6624 to 0.7657 | 1 | 0.9924 to 1.000 | 0.2848 |
| 81.33 | 0.712  | 0.6591 to 0.7626 | 1 | 0.9924 to 1.000 | 0.288  |
| 81.54 | 0.7087 | 0.6557 to 0.7596 | 1 | 0.9924 to 1.000 | 0.2913 |
| 81.58 | 0.7055 | 0.6523 to 0.7566 | 1 | 0.9924 to 1.000 | 0.2945 |
| 81.86 | 0.7023 | 0.6490 to 0.7535 | 1 | 0.9924 to 1.000 | 0.2977 |
| 82.29 | 0.699  | 0.6456 to 0.7505 | 1 | 0.9924 to 1.000 | 0.301  |
| 82.73 | 0.6958 | 0.6423 to 0.7475 | 1 | 0.9924 to 1.000 | 0.3042 |
| 83.25 | 0.6926 | 0.6389 to 0.7444 | 1 | 0.9924 to 1.000 | 0.3074 |
| 83.65 | 0.6893 | 0.6356 to 0.7414 | 1 | 0.9924 to 1.000 | 0.3107 |
| 83.86 | 0.6861 | 0.6323 to 0.7383 | 1 | 0.9924 to 1.000 | 0.3139 |
| 84.13 | 0.6828 | 0.6289 to 0.7353 | 1 | 0.9924 to 1.000 | 0.3172 |
| 84.42 | 0.6796 | 0.6256 to 0.7322 | 1 | 0.9924 to 1.000 | 0.3204 |
| 84.73 | 0.6764 | 0.6223 to 0.7292 | 1 | 0.9924 to 1.000 | 0.3236 |
| 84.98 | 0.6731 | 0.6189 to 0.7261 | 1 | 0.9924 to 1.000 | 0.3269 |
| 85.01 | 0.6699 | 0.6156 to 0.7230 | 1 | 0.9924 to 1.000 | 0.3301 |
| 85.03 | 0.6667 | 0.6123 to 0.7200 | 1 | 0.9924 to 1.000 | 0.3333 |
| 85.06 | 0.6634 | 0.6090 to 0.7169 | 1 | 0.9924 to 1.000 | 0.3366 |
| 85.1  | 0.6602 | 0.6056 to 0.7138 | 1 | 0.9924 to 1.000 | 0.3398 |
| 85.29 | 0.657  | 0.6023 to 0.7107 | 1 | 0.9924 to 1.000 | 0.343  |
| 85.5  | 0.6537 | 0.5990 to 0.7077 | 1 | 0.9924 to 1.000 | 0.3463 |
| 85.58 | 0.6505 | 0.5957 to 0.7046 | 1 | 0.9924 to 1.000 | 0.3495 |
| 85.62 | 0.6472 | 0.5924 to 0.7015 | 1 | 0.9924 to 1.000 | 0.3528 |
| 85.67 | 0.644  | 0.5891 to 0.6984 | 1 | 0.9924 to 1.000 | 0.356  |
| 85.83 | 0.6408 | 0.5858 to 0.6953 | 1 | 0.9924 to 1.000 | 0.3592 |
| 86.31 | 0.6375 | 0.5825 to 0.6922 | 1 | 0.9924 to 1.000 | 0.3625 |
| 86.69 | 0.6343 | 0.5792 to 0.6892 | 1 | 0.9924 to 1.000 | 0.3657 |
| 86.81 | 0.6311 | 0.5759 to 0.6861 | 1 | 0.9924 to 1.000 | 0.3689 |
| 87.1  | 0.6278 | 0.5726 to 0.6830 | 1 | 0.9924 to 1.000 | 0.3722 |
| 87.4  | 0.6246 | 0.5693 to 0.6799 | 1 | 0.9924 to 1.000 | 0.3754 |
| 87.55 | 0.6214 | 0.5660 to 0.6768 | 1 | 0.9924 to 1.000 | 0.3786 |
| 87.7  | 0.6181 | 0.5628 to 0.6736 | 1 | 0.9924 to 1.000 | 0.3819 |
| 87.91 | 0.6149 | 0.5595 to 0.6705 | 1 | 0.9924 to 1.000 | 0.3851 |
| 88.06 | 0.6117 | 0.5562 to 0.6674 | 1 | 0.9924 to 1.000 | 0.3883 |
| 88.21 | 0.6084 | 0.5529 to 0.6643 | 1 | 0.9924 to 1.000 | 0.3916 |
| 88.49 | 0.6052 | 0.5496 to 0.6612 | 1 | 0.9924 to 1.000 | 0.3948 |
| 88.74 | 0.6019 | 0.5464 to 0.6581 | 1 | 0.9924 to 1.000 | 0.3981 |
| 88.89 | 0.5987 | 0.5431 to 0.6550 | 1 | 0.9924 to 1.000 | 0.4013 |
| 89.11 | 0.5955 | 0.5398 to 0.6518 | 1 | 0.9924 to 1.000 | 0.4045 |
| 89.34 | 0.5922 | 0.5366 to 0.6487 | 1 | 0.9924 to 1.000 | 0.4078 |
| 89.56 | 0.589  | 0.5333 to 0.6456 | 1 | 0.9924 to 1.000 | 0.411  |
| 89.75 | 0.5858 | 0.5301 to 0.6425 | 1 | 0.9924 to 1.000 | 0.4142 |

|       |        |                  |   |                 |        |
|-------|--------|------------------|---|-----------------|--------|
| 89.79 | 0.5825 | 0.5268 to 0.6393 | 1 | 0.9924 to 1.000 | 0.4175 |
| 89.87 | 0.5793 | 0.5235 to 0.6362 | 1 | 0.9924 to 1.000 | 0.4207 |
| 90.05 | 0.5761 | 0.5203 to 0.6330 | 1 | 0.9924 to 1.000 | 0.4239 |
| 90.21 | 0.5728 | 0.5170 to 0.6299 | 1 | 0.9924 to 1.000 | 0.4272 |
| 90.48 | 0.5696 | 0.5138 to 0.6268 | 1 | 0.9924 to 1.000 | 0.4304 |
| 90.82 | 0.5663 | 0.5106 to 0.6236 | 1 | 0.9924 to 1.000 | 0.4337 |
| 91.09 | 0.5631 | 0.5073 to 0.6205 | 1 | 0.9924 to 1.000 | 0.4369 |
| 91.31 | 0.5599 | 0.5041 to 0.6173 | 1 | 0.9924 to 1.000 | 0.4401 |
| 91.5  | 0.5566 | 0.5008 to 0.6142 | 1 | 0.9924 to 1.000 | 0.4434 |
| 91.8  | 0.5534 | 0.4976 to 0.6110 | 1 | 0.9924 to 1.000 | 0.4466 |
| 92.19 | 0.5502 | 0.4944 to 0.6079 | 1 | 0.9924 to 1.000 | 0.4498 |
| 92.45 | 0.5469 | 0.4911 to 0.6047 | 1 | 0.9924 to 1.000 | 0.4531 |
| 92.5  | 0.5437 | 0.4879 to 0.6015 | 1 | 0.9924 to 1.000 | 0.4563 |
| 92.61 | 0.5405 | 0.4847 to 0.5984 | 1 | 0.9924 to 1.000 | 0.4595 |
| 92.71 | 0.5372 | 0.4815 to 0.5952 | 1 | 0.9924 to 1.000 | 0.4628 |
| 92.76 | 0.534  | 0.4782 to 0.5920 | 1 | 0.9924 to 1.000 | 0.466  |
| 92.9  | 0.5307 | 0.4750 to 0.5889 | 1 | 0.9924 to 1.000 | 0.4693 |
| 93.02 | 0.5275 | 0.4718 to 0.5857 | 1 | 0.9924 to 1.000 | 0.4725 |
| 93.05 | 0.5243 | 0.4686 to 0.5825 | 1 | 0.9924 to 1.000 | 0.4757 |
| 93.14 | 0.521  | 0.4654 to 0.5793 | 1 | 0.9924 to 1.000 | 0.479  |
| 93.24 | 0.5178 | 0.4622 to 0.5762 | 1 | 0.9924 to 1.000 | 0.4822 |
| 93.32 | 0.5146 | 0.4590 to 0.5730 | 1 | 0.9924 to 1.000 | 0.4854 |
| 93.39 | 0.5113 | 0.4558 to 0.5698 | 1 | 0.9924 to 1.000 | 0.4887 |
| 93.49 | 0.5081 | 0.4526 to 0.5666 | 1 | 0.9924 to 1.000 | 0.4919 |
| 93.82 | 0.5049 | 0.4494 to 0.5634 | 1 | 0.9924 to 1.000 | 0.4951 |
| 94.31 | 0.5016 | 0.4430 to 0.5570 | 1 | 0.9924 to 1.000 | 0.4984 |
| 94.82 | 0.4984 | 0.4430 to 0.5570 | 1 | 0.9924 to 1.000 | 0.5016 |
| 95.1  | 0.4951 | 0.4366 to 0.5506 | 1 | 0.9924 to 1.000 | 0.5049 |
| 95.13 | 0.4919 | 0.4334 to 0.5474 | 1 | 0.9924 to 1.000 | 0.5081 |
| 95.15 | 0.4887 | 0.4302 to 0.5442 | 1 | 0.9924 to 1.000 | 0.5113 |
| 95.16 | 0.4854 | 0.4270 to 0.5410 | 1 | 0.9924 to 1.000 | 0.5146 |
| 95.19 | 0.4822 | 0.4238 to 0.5378 | 1 | 0.9924 to 1.000 | 0.5178 |
| 95.33 | 0.479  | 0.4207 to 0.5346 | 1 | 0.9924 to 1.000 | 0.521  |
| 95.48 | 0.4757 | 0.4175 to 0.5314 | 1 | 0.9924 to 1.000 | 0.5243 |
| 95.53 | 0.4725 | 0.4143 to 0.5282 | 1 | 0.9924 to 1.000 | 0.5275 |
| 95.73 | 0.4693 | 0.4111 to 0.5250 | 1 | 0.9924 to 1.000 | 0.5307 |
| 96.13 | 0.466  | 0.4080 to 0.5218 | 1 | 0.9924 to 1.000 | 0.534  |
| 96.4  | 0.4628 | 0.4048 to 0.5185 | 1 | 0.9924 to 1.000 | 0.5372 |
| 96.53 | 0.4595 | 0.4016 to 0.5153 | 1 | 0.9924 to 1.000 | 0.5405 |
| 96.68 | 0.4563 | 0.3985 to 0.5121 | 1 | 0.9924 to 1.000 | 0.5437 |
| 96.8  | 0.4531 | 0.3953 to 0.5089 | 1 | 0.9924 to 1.000 | 0.5469 |
| 97.01 | 0.4498 | 0.3921 to 0.5056 | 1 | 0.9924 to 1.000 | 0.5502 |
| 97.32 | 0.4466 | 0.3890 to 0.5024 | 1 | 0.9924 to 1.000 | 0.5534 |
| 97.53 | 0.4434 | 0.3858 to 0.4992 | 1 | 0.9924 to 1.000 | 0.5566 |
| 97.64 | 0.4401 | 0.3827 to 0.4959 | 1 | 0.9924 to 1.000 | 0.5599 |

|       |        |                  |   |                 |        |
|-------|--------|------------------|---|-----------------|--------|
| 97.76 | 0.4369 | 0.3795 to 0.4927 | 1 | 0.9924 to 1.000 | 0.5631 |
| 97.95 | 0.4337 | 0.3764 to 0.4894 | 1 | 0.9924 to 1.000 | 0.5663 |
| 98.07 | 0.4304 | 0.3732 to 0.4862 | 1 | 0.9924 to 1.000 | 0.5696 |
| 98.3  | 0.4239 | 0.3670 to 0.4797 | 1 | 0.9924 to 1.000 | 0.5761 |
| 98.5  | 0.4207 | 0.3638 to 0.4765 | 1 | 0.9924 to 1.000 | 0.5793 |
| 98.7  | 0.4175 | 0.3607 to 0.4732 | 1 | 0.9924 to 1.000 | 0.5825 |
| 98.92 | 0.4142 | 0.3575 to 0.4699 | 1 | 0.9924 to 1.000 | 0.5858 |
| 98.97 | 0.411  | 0.3544 to 0.4667 | 1 | 0.9924 to 1.000 | 0.589  |
| 99.02 | 0.4078 | 0.3513 to 0.4634 | 1 | 0.9924 to 1.000 | 0.5922 |
| 99.07 | 0.4045 | 0.3482 to 0.4602 | 1 | 0.9924 to 1.000 | 0.5955 |
| 99.11 | 0.4013 | 0.3450 to 0.4569 | 1 | 0.9924 to 1.000 | 0.5987 |
| 99.28 | 0.3981 | 0.3419 to 0.4536 | 1 | 0.9924 to 1.000 | 0.6019 |
| 99.45 | 0.3948 | 0.3388 to 0.4504 | 1 | 0.9924 to 1.000 | 0.6052 |
| 99.48 | 0.3916 | 0.3357 to 0.4471 | 1 | 0.9924 to 1.000 | 0.6084 |
| 99.52 | 0.3883 | 0.3326 to 0.4438 | 1 | 0.9924 to 1.000 | 0.6117 |
| 99.59 | 0.3851 | 0.3295 to 0.4405 | 1 | 0.9924 to 1.000 | 0.6149 |
| 99.65 | 0.3819 | 0.3264 to 0.4372 | 1 | 0.9924 to 1.000 | 0.6181 |
| 99.68 | 0.3786 | 0.3232 to 0.4340 | 1 | 0.9924 to 1.000 | 0.6214 |
| 99.72 | 0.3754 | 0.3201 to 0.4307 | 1 | 0.9924 to 1.000 | 0.6246 |
| 99.76 | 0.3722 | 0.3170 to 0.4274 | 1 | 0.9924 to 1.000 | 0.6278 |
| 99.93 | 0.3689 | 0.3139 to 0.4241 | 1 | 0.9924 to 1.000 | 0.6311 |
| 100.1 | 0.3657 | 0.3108 to 0.4208 | 1 | 0.9924 to 1.000 | 0.6343 |
| 100.4 | 0.3625 | 0.3078 to 0.4175 | 1 | 0.9924 to 1.000 | 0.6375 |
| 100.7 | 0.3592 | 0.3047 to 0.4142 | 1 | 0.9924 to 1.000 | 0.6408 |
| 100.8 | 0.356  | 0.3016 to 0.4109 | 1 | 0.9924 to 1.000 | 0.644  |
| 100.9 | 0.3528 | 0.2985 to 0.4076 | 1 | 0.9924 to 1.000 | 0.6472 |
| 101   | 0.3495 | 0.2954 to 0.4043 | 1 | 0.9924 to 1.000 | 0.6505 |
| 101.1 | 0.3463 | 0.2923 to 0.4010 | 1 | 0.9924 to 1.000 | 0.6537 |
| 101.1 | 0.343  | 0.2893 to 0.3977 | 1 | 0.9924 to 1.000 | 0.657  |
| 101.2 | 0.3398 | 0.2862 to 0.3944 | 1 | 0.9924 to 1.000 | 0.6602 |
| 101.3 | 0.3366 | 0.2831 to 0.3910 | 1 | 0.9924 to 1.000 | 0.6634 |
| 101.4 | 0.3333 | 0.2800 to 0.3877 | 1 | 0.9924 to 1.000 | 0.6667 |
| 101.4 | 0.3301 | 0.2770 to 0.3844 | 1 | 0.9924 to 1.000 | 0.6699 |
| 101.6 | 0.3269 | 0.2739 to 0.3811 | 1 | 0.9924 to 1.000 | 0.6731 |
| 102   | 0.3236 | 0.2708 to 0.3777 | 1 | 0.9924 to 1.000 | 0.6764 |
| 102.1 | 0.3204 | 0.2678 to 0.3744 | 1 | 0.9924 to 1.000 | 0.6796 |
| 102.2 | 0.3172 | 0.2647 to 0.3711 | 1 | 0.9924 to 1.000 | 0.6828 |
| 102.4 | 0.3139 | 0.2617 to 0.3677 | 1 | 0.9924 to 1.000 | 0.6861 |
| 102.6 | 0.3107 | 0.2586 to 0.3644 | 1 | 0.9924 to 1.000 | 0.6893 |
| 102.6 | 0.3074 | 0.2556 to 0.3611 | 1 | 0.9924 to 1.000 | 0.6926 |
| 102.7 | 0.3042 | 0.2525 to 0.3577 | 1 | 0.9924 to 1.000 | 0.6958 |
| 102.8 | 0.301  | 0.2495 to 0.3544 | 1 | 0.9924 to 1.000 | 0.699  |
| 102.9 | 0.2977 | 0.2465 to 0.3510 | 1 | 0.9924 to 1.000 | 0.7023 |
| 103.2 | 0.2945 | 0.2434 to 0.3477 | 1 | 0.9924 to 1.000 | 0.7055 |
| 103.4 | 0.2913 | 0.2404 to 0.3443 | 1 | 0.9924 to 1.000 | 0.7087 |

|       |        |                  |   |                 |        |
|-------|--------|------------------|---|-----------------|--------|
| 103.6 | 0.288  | 0.2374 to 0.3409 | 1 | 0.9924 to 1.000 | 0.712  |
| 103.6 | 0.2848 | 0.2343 to 0.3376 | 1 | 0.9924 to 1.000 | 0.7152 |
| 103.7 | 0.2783 | 0.2283 to 0.3308 | 1 | 0.9924 to 1.000 | 0.7217 |
| 103.8 | 0.2751 | 0.2253 to 0.3275 | 1 | 0.9924 to 1.000 | 0.7249 |
| 104.2 | 0.2718 | 0.2223 to 0.3241 | 1 | 0.9924 to 1.000 | 0.7282 |
| 104.6 | 0.2686 | 0.2193 to 0.3207 | 1 | 0.9924 to 1.000 | 0.7314 |
| 104.7 | 0.2654 | 0.2163 to 0.3173 | 1 | 0.9924 to 1.000 | 0.7346 |
| 104.7 | 0.2621 | 0.2133 to 0.3139 | 1 | 0.9924 to 1.000 | 0.7379 |
| 104.9 | 0.2589 | 0.2103 to 0.3106 | 1 | 0.9924 to 1.000 | 0.7411 |
| 105.1 | 0.2557 | 0.2073 to 0.3072 | 1 | 0.9924 to 1.000 | 0.7443 |
| 105.1 | 0.2524 | 0.2043 to 0.3038 | 1 | 0.9924 to 1.000 | 0.7476 |
| 105.3 | 0.2492 | 0.2013 to 0.3004 | 1 | 0.9924 to 1.000 | 0.7508 |
| 105.4 | 0.246  | 0.1983 to 0.2970 | 1 | 0.9924 to 1.000 | 0.754  |
| 105.7 | 0.2427 | 0.1953 to 0.2936 | 1 | 0.9924 to 1.000 | 0.7573 |
| 106   | 0.2395 | 0.1923 to 0.2901 | 1 | 0.9924 to 1.000 | 0.7605 |
| 106.2 | 0.2362 | 0.1894 to 0.2867 | 1 | 0.9924 to 1.000 | 0.7638 |
| 106.3 | 0.233  | 0.1864 to 0.2833 | 1 | 0.9924 to 1.000 | 0.767  |
| 106.4 | 0.2298 | 0.1834 to 0.2799 | 1 | 0.9924 to 1.000 | 0.7702 |
| 106.5 | 0.2265 | 0.1805 to 0.2765 | 1 | 0.9924 to 1.000 | 0.7735 |
| 106.9 | 0.2233 | 0.1775 to 0.2730 | 1 | 0.9924 to 1.000 | 0.7767 |
| 107.5 | 0.2201 | 0.1746 to 0.2696 | 1 | 0.9924 to 1.000 | 0.7799 |
| 107.7 | 0.2168 | 0.1716 to 0.2662 | 1 | 0.9924 to 1.000 | 0.7832 |
| 107.8 | 0.2136 | 0.1687 to 0.2627 | 1 | 0.9924 to 1.000 | 0.7864 |
| 107.9 | 0.2104 | 0.1657 to 0.2593 | 1 | 0.9924 to 1.000 | 0.7896 |
| 108   | 0.2071 | 0.1628 to 0.2558 | 1 | 0.9924 to 1.000 | 0.7929 |
| 108   | 0.2039 | 0.1598 to 0.2524 | 1 | 0.9924 to 1.000 | 0.7961 |
| 108.1 | 0.2006 | 0.1569 to 0.2489 | 1 | 0.9924 to 1.000 | 0.7994 |
| 108.5 | 0.1974 | 0.1540 to 0.2455 | 1 | 0.9924 to 1.000 | 0.8026 |
| 108.8 | 0.1942 | 0.1511 to 0.2420 | 1 | 0.9924 to 1.000 | 0.8058 |
| 109   | 0.1909 | 0.1482 to 0.2385 | 1 | 0.9924 to 1.000 | 0.8091 |
| 109.2 | 0.1877 | 0.1452 to 0.2350 | 1 | 0.9924 to 1.000 | 0.8123 |
| 109.3 | 0.1845 | 0.1423 to 0.2316 | 1 | 0.9924 to 1.000 | 0.8155 |
| 109.4 | 0.1812 | 0.1394 to 0.2281 | 1 | 0.9924 to 1.000 | 0.8188 |
| 109.6 | 0.178  | 0.1365 to 0.2246 | 1 | 0.9924 to 1.000 | 0.822  |
| 109.8 | 0.1748 | 0.1337 to 0.2211 | 1 | 0.9924 to 1.000 | 0.8252 |
| 110   | 0.1715 | 0.1308 to 0.2176 | 1 | 0.9924 to 1.000 | 0.8285 |
| 110.3 | 0.1683 | 0.1279 to 0.2141 | 1 | 0.9924 to 1.000 | 0.8317 |
| 110.6 | 0.165  | 0.1250 to 0.2106 | 1 | 0.9924 to 1.000 | 0.835  |
| 110.7 | 0.1618 | 0.1221 to 0.2071 | 1 | 0.9924 to 1.000 | 0.8382 |
| 110.9 | 0.1586 | 0.1193 to 0.2035 | 1 | 0.9924 to 1.000 | 0.8414 |
| 111.1 | 0.1553 | 0.1164 to 0.2000 | 1 | 0.9924 to 1.000 | 0.8447 |
| 111.4 | 0.1521 | 0.1136 to 0.1965 | 1 | 0.9924 to 1.000 | 0.8479 |
| 111.7 | 0.1489 | 0.1107 to 0.1929 | 1 | 0.9924 to 1.000 | 0.8511 |
| 111.8 | 0.1456 | 0.1079 to 0.1894 | 1 | 0.9924 to 1.000 | 0.8544 |
| 111.9 | 0.1424 | 0.1051 to 0.1858 | 1 | 0.9924 to 1.000 | 0.8576 |



|       |         |                       |   |                 |        |
|-------|---------|-----------------------|---|-----------------|--------|
| 112   | 0.1392  | 0.1022 to 0.1823      | 1 | 0.9924 to 1.000 | 0.8608 |
| 112.5 | 0.1359  | 0.09942 to 0.1787     | 1 | 0.9924 to 1.000 | 0.8641 |
| 113   | 0.1327  | 0.09661 to 0.1751     | 1 | 0.9924 to 1.000 | 0.8673 |
| 113.1 | 0.1294  | 0.09381 to 0.1715     | 1 | 0.9924 to 1.000 | 0.8706 |
| 113.4 | 0.1262  | 0.09101 to 0.1679     | 1 | 0.9924 to 1.000 | 0.8738 |
| 113.9 | 0.123   | 0.08822 to 0.1644     | 1 | 0.9924 to 1.000 | 0.877  |
| 114.3 | 0.1197  | 0.08545 to 0.1607     | 1 | 0.9924 to 1.000 | 0.8803 |
| 114.5 | 0.1165  | 0.08267 to 0.1571     | 1 | 0.9924 to 1.000 | 0.8835 |
| 114.6 | 0.1133  | 0.07991 to 0.1535     | 1 | 0.9924 to 1.000 | 0.8867 |
| 114.7 | 0.11    | 0.07716 to 0.1499     | 1 | 0.9924 to 1.000 | 0.89   |
| 115   | 0.1068  | 0.07442 to 0.1462     | 1 | 0.9924 to 1.000 | 0.8932 |
| 115.2 | 0.1036  | 0.07168 to 0.1426     | 1 | 0.9924 to 1.000 | 0.8964 |
| 115.3 | 0.1003  | 0.06896 to 0.1389     | 1 | 0.9924 to 1.000 | 0.8997 |
| 115.4 | 0.0971  | 0.06625 to 0.1353     | 1 | 0.9924 to 1.000 | 0.9029 |
| 115.6 | 0.0939  | 0.06355 to 0.1316     | 1 | 0.9924 to 1.000 | 0.9062 |
| 115.9 | 0.0906  | 0.06086 to 0.1279     | 1 | 0.9924 to 1.000 | 0.9094 |
| 116.1 | 0.0874  | 0.05818 to 0.1242     | 1 | 0.9924 to 1.000 | 0.9126 |
| 116.4 | 0.0841  | 0.05552 to 0.1205     | 1 | 0.9924 to 1.000 | 0.9159 |
| 116.5 | 0.0809  | 0.05287 to 0.1167     | 1 | 0.9924 to 1.000 | 0.9191 |
| 117.3 | 0.0777  | 0.05023 to 0.1130     | 1 | 0.9924 to 1.000 | 0.9223 |
| 118.5 | 0.0744  | 0.04761 to 0.1092     | 1 | 0.9924 to 1.000 | 0.9256 |
| 119   | 0.0712  | 0.04501 to 0.1055     | 1 | 0.9924 to 1.000 | 0.9288 |
| 119.4 | 0.068   | 0.04242 to 0.1017     | 1 | 0.9924 to 1.000 | 0.932  |
| 119.8 | 0.0647  | 0.03985 to 0.09788    | 1 | 0.9924 to 1.000 | 0.9353 |
| 120.1 | 0.0615  | 0.03730 to 0.09406    | 1 | 0.9924 to 1.000 | 0.9385 |
| 120.3 | 0.0583  | 0.03477 to 0.09022    | 1 | 0.9924 to 1.000 | 0.9418 |
| 120.9 | 0.055   | 0.03227 to 0.08635    | 1 | 0.9924 to 1.000 | 0.945  |
| 121.5 | 0.0518  | 0.02979 to 0.08246    | 1 | 0.9924 to 1.000 | 0.9482 |
| 121.8 | 0.0485  | 0.02733 to 0.07855    | 1 | 0.9924 to 1.000 | 0.9515 |
| 122.3 | 0.0453  | 0.02491 to 0.07461    | 1 | 0.9924 to 1.000 | 0.9547 |
| 122.9 | 0.0421  | 0.02251 to 0.07064    | 1 | 0.9924 to 1.000 | 0.9579 |
| 123.4 | 0.0388  | 0.02016 to 0.06664    | 1 | 0.9924 to 1.000 | 0.9612 |
| 125.2 | 0.0356  | 0.01784 to 0.06260    | 1 | 0.9924 to 1.000 | 0.9644 |
| 127.3 | 0.0324  | 0.01558 to 0.05852    | 1 | 0.9924 to 1.000 | 0.9676 |
| 130.5 | 0.0291  | 0.01336 to 0.05440    | 1 | 0.9924 to 1.000 | 0.9709 |
| 133.3 | 0.0259  | 0.01121 to 0.05021    | 1 | 0.9924 to 1.000 | 0.9741 |
| 133.7 | 0.0227  | 0.009126 to 0.04597   | 1 | 0.9924 to 1.000 | 0.9774 |
| 134.6 | 0.0194  | 0.007135 to 0.04165   | 1 | 0.9924 to 1.000 | 0.9806 |
| 135.2 | 0.0162  | 0.005257 to 0.03724   | 1 | 0.9924 to 1.000 | 0.9838 |
| 136.1 | 0.0129  | 0.003527 to 0.03271   | 1 | 0.9924 to 1.000 | 0.9871 |
| 138.5 | 0.00971 | 0.002000 to 0.02802   | 1 | 0.9924 to 1.000 | 0.9903 |
| 143.3 | 0.00647 | 0.000782 to 0.02311   | 1 | 0.9924 to 1.000 | 0.9935 |
| 147.6 | 0.00324 | 0.00008167 to 0.01784 | 1 | 0.9924 to 1.000 | 0.9968 |
